# Supplementary material for: A persistent radical anion naphthalenediimide-based hybrid material for near-infrared photothermal conversion and photocatalytic oxidative organic transformations
Source: Royal Society of Chemistry journal article supplement (doi:10.1039/d4qi00941j), 2024-01-01
Supplement: d4qi00941j1.pdf [file d4qi00941j1.pdf]

# Persistent radical anions naphthalenediimide-based hybrid material for near-infrared photothermal conversion and photocatalytic oxidative organic transformations

*Weijun Dai, †<sup>a,b</sup> Chixian He, †<sup>a</sup> Sirui Li,<sup>a</sup> Yuanrong Xu,<sup>a</sup> Feixiang Cheng,<sup>a\*</sup> Jian-Jun Liu<sup>a\*</sup>*

<sup>a</sup> College of Chemistry and Environmental Science, Qujing Normal University, Qujing 655011, China.

<sup>b</sup> School of Ethnic Medicine, Yunnan Minzu University, Kunming 650504, China

† These authors contributed equally to this work and can be considered as co-first authors

## **Supplementary Methods:**

### **General methods**

All air- and moisture-sensitive solutions and chemicals were handled under an argon atmosphere. Anhydrous solvents were purchased from Sigma-Aldrich and used without further purification. Unless otherwise stated, all reagents were commercially available and used as received without further purification. Chemicals were obtained from Sigma-Aldrich, Acros, TCI and Alfa-Aesar. TLC was performed with Merck TLC Silica gel60 F<sub>254</sub> plates with detection under UV light at 254 nm. Silica gel (200-300 mesh, Qingdao) was used for flash chromatography. Deactivated silica gel was prepared by addition of 15 mL Et<sub>3</sub>N to 1 L of silica gel. Powder X-ray diffraction (XRD) measurements was recorded on a Bruker D8 ADVANCE X-Ray diffractometer at room temperature using a graphite monochromator Cu-target tube. UV-Vis spectra were performed on a Varian Cary 500 UV-Vis spectrophotometer. Thermostability of materials were performed on a Mettler Toledo TGA2 thermogravimetric system at N<sub>2</sub> atmosphere from 30 to 800 °C with a ramp rate of 10 °C/min. The electrochemical measurements were carried out using a Princeton 2273 electrochemical workstation. Fourier transform infrared (IR) spectra have been recorded on a Nicolet iS50 spectrometer using KBr disks dispersed with material powder. Nuclear magnetic resonance (NMR) spectrum was measured on a Bruker Avance III 400 M. Electron paramagnetic resonance (EPR) spectra were recorded on a Bruker A300 ESR spectrometer.

### **Synthesis of SiMo-NDI**

A Teflon-lined steel autoclave (15 mL) was charged with H<sub>4</sub>BNDI ligand (59.4 mg, 0.1 mmol), H<sub>4</sub>SiMo<sub>12</sub>O<sub>40</sub> (93.4 mg, 0.05 mmol), Ce(NO<sub>3</sub>)<sub>3</sub>·6H<sub>2</sub>O (86.8 mg, 0.20 mmol), *N,N*-

dimethylacetamide (DMA, 4 mL), and acetonitrile (2 mL). The mixture was stirred under air for 5 min to achieve a homogenous dispersion. The autoclave was degassed by bubbling nitrogen for 5 min, was sealed and was heated at 100 °C for 2 days. After cooling to room temperature, the resulting precipitate was filtered and washed sequentially with DMA, acetonitrile and ethanol, and dried in air to provide light-yellow crystalline SiMo-NDI (approximate yield 62%). Anal. Calcd for  $C_{124}H_{164}Ce_4Mo_{12}N_{20}O_{80}Si$ : C 30.03, H 3.31, N 5.65%. Found: C 30.46, H 3.39, N 5.78%. IR (KBr,  $cm^{-1}$ ): 3411(br), 3071(w), 2930(w), 1721(s), 1679(s), 1606(s), 1550(s), 1405(s), 1343(s), 1251(s), 1193(m), 973(s), 920(s), 801(s). Note that crystallographic data for SiMo-NDI have been deposited with the Cambridge Crystallographic Data Center as supplementary publication number CCDC 2348162.

### **Photothermal conversion properties measurement.**

The 200 mg SiMo-NDI material was pressed into 5-mm-diameter pellet using a manual tablet press at the pressure of 3.0 Mpa. The obtained pellet was under continuous irradiation of a 808 nm laser until the sample reached a steady-state temperature. The temperature was monitored every 1 s by a Fluke (Ti400) thermal imaging camera. The 808 nm laser beam was irradiated at a power density from 0.2 to 1.0  $W \cdot cm^{-2}$ .

### **Electrochemical Measurements**

SiMo-NDI powder (10 mg) was ground with poly(vinylidene fluoride) (4 mg) and then ultrasonically dispersed in 3 mL of acetone. The resultant slurry was then drop-casted onto indium tin oxide (ITO) glass with an area of  $0.5 \times 0.5 \text{ cm}^2$ . A Pt wire (counter electrode), a Ag/AgCl electrode (reference electrode), and a coated ITO conductive glass (working

electrode) were assembled into a three-electrode system with 0.2 M Na<sub>2</sub>SO<sub>4</sub> aqueous solution used as the electrolyte. The Mott-Schottky plots were collected in dark at different frequencies. The photocurrent measurements were conducted under the irradiation of a 300 W xenon lamp with a 420 nm cut-off filter under a nitrogen- or oxygen-saturated atmosphere.

### **Methods of Transient Absorption Spectra**

Details of the femtosecond pump-probe TA measurements were similar to the literature procedures (Nat. Commun. 2023, 14, 4002). Briefly, the laser source was a regenerative amplified Ti:sapphire laser system (Coherent; 400 nm, 70 fs, 6 mJ/pulse, 1 kHz repetition rate). The 400 nm output pulse was split into two parts with a 50% beam splitter. One part was used to pump an OPA, which can generate a wavelength-tunable laser pulse from 250 nm to 2.5 μm using as a pump beam. Another part was attenuated with a neutral density filter and focused into a sapphire or CaF<sub>2</sub> crystal to generate a white light continuum for the probe beam. The pump pulses were chopped by a synchronised chopper at 500 Hz, and the absorbance change was calculated with two adjacent probe pulses (pump-blocked and pump-unblocked). The delay between the pump and probe pulses was controlled by a motorised delay stage. For fs TA measurements, SiMo-NDI single crystal (0.35\*0.06\*0.05) was filled in 1 mm airtight cuvettes prepared in a N<sub>2</sub>-filled glove box and measured under ambient conditions, and the UV-visible (UV-vis) absorbances of all samples were adjusted to 0.5 before further characterisation.

## **Procedure and characterization for hydroxylation of arylboronic acids and C-3 thiocyanation of indoles**

### **General Procedure A: hydroxylation of arylboronic acids**

In a dry 10 mL Schlenk tube equipped with a stirring bar, arylboronic acids (0.5 mmol), SiMo-NDI (5 mol%) and DMF (5 mL) were added in air. The mixture was exposed to radiation under a 50 W white LED at a distance of 10 cm and stirred for 24 hours at room temperature. The mixture was extracted with ethyl acetate (3 × 30 mL). The combined organic layers were washed with saturated brine solution (20 mL), dried (MgSO<sub>4</sub>), filtered and concentrated under reduced pressure. The crude products were purified by flash chromatography by loading them onto a deactivated silica gel column (eluted with ethyl acetate: petroleum ether = 2:1) to give the corresponding colorless liquid or solid products **2a-2p**.

### **General Procedure B: C-3 thiocyanation of indoles**

An oven-dried 10 mL Schlenk tube equipped with a stir bar was charged with indoles (0.5 mmol), ammonium thiocyanate (1.0 mmol), SiMo-NDI (5 mol%), and tetrahydrofuran (5 mL). The reaction system was then exposed to air and stirred at room temperature for a period of 24 hours, while being irradiated by a 50 W white LED at a distance of 10 cm. Once the reaction was complete, the mixture was diluted with H<sub>2</sub>O and ethyl acetate, the layers were separated and the aqueous phase was extracted with ethyl acetate (3 × 10 mL). The combined organic layers were washed with saturated brine solution (20 mL), dried (MgSO<sub>4</sub>), filtered and concentrated *in vacuo*. The crude products were purified by column chromatography on silica gel (eluting with ethyl acetate: petroleum ether =4:1) to give the corresponding C-3 thiocyanation products of indoles **5a-5i**.

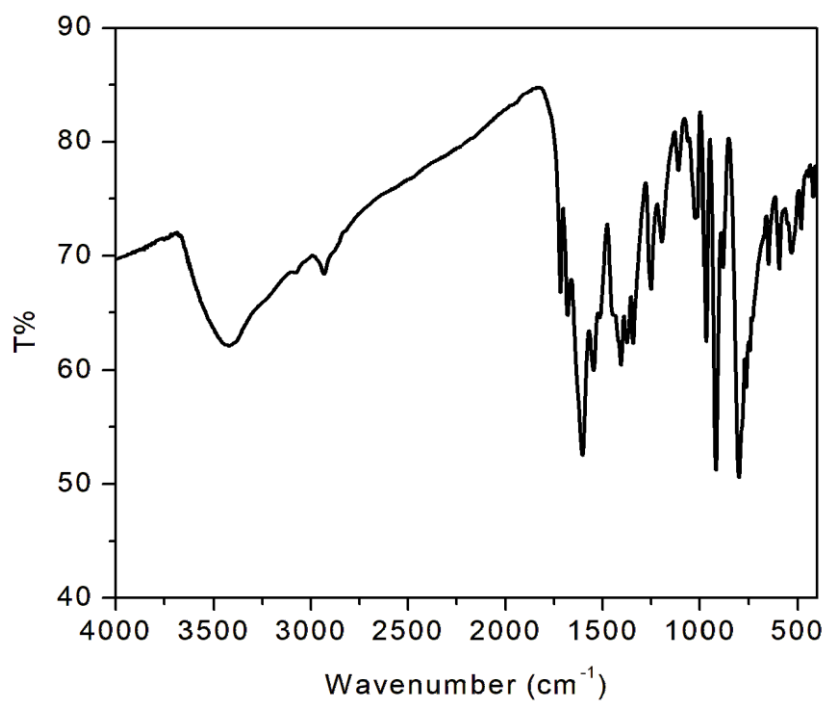

Fig. S1. IR spectrum of SiMo-NDI.

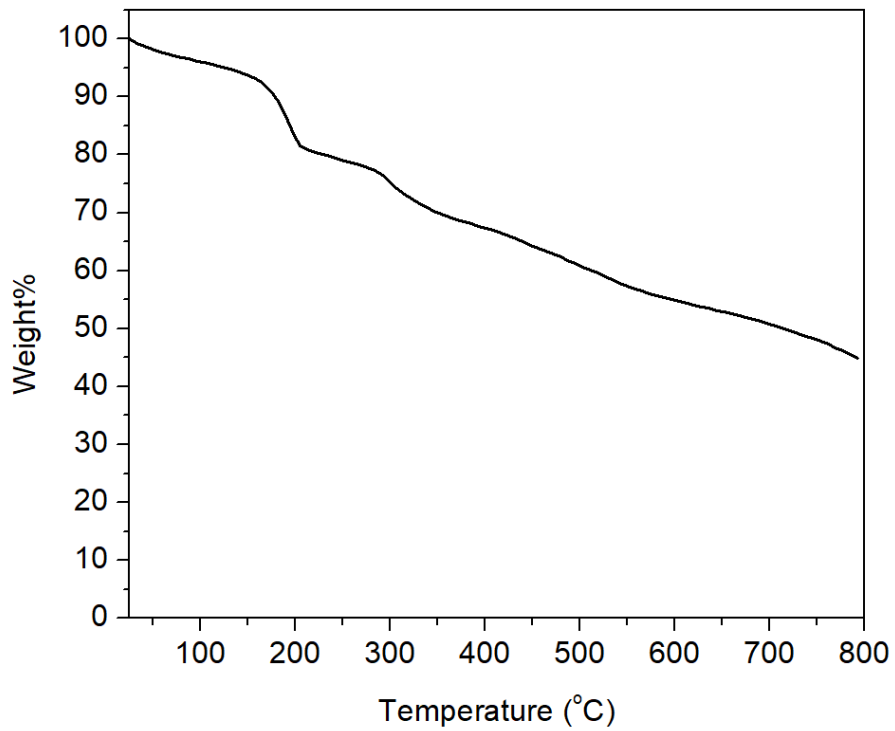

Fig. S2. TGA curve of SiMo-NDI.

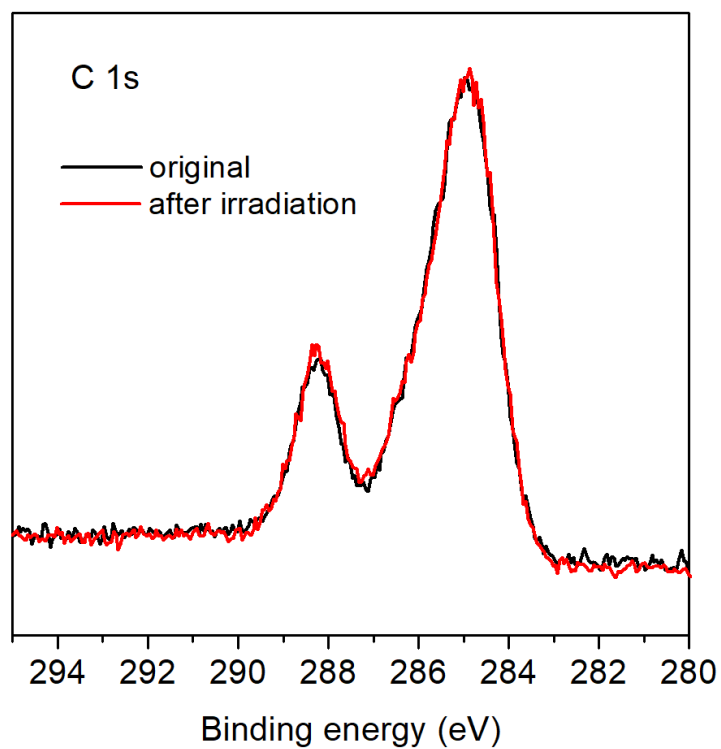

Fig. S3. C 1s XPS core-level spectra of SiMo-NDI before and after irradiation.

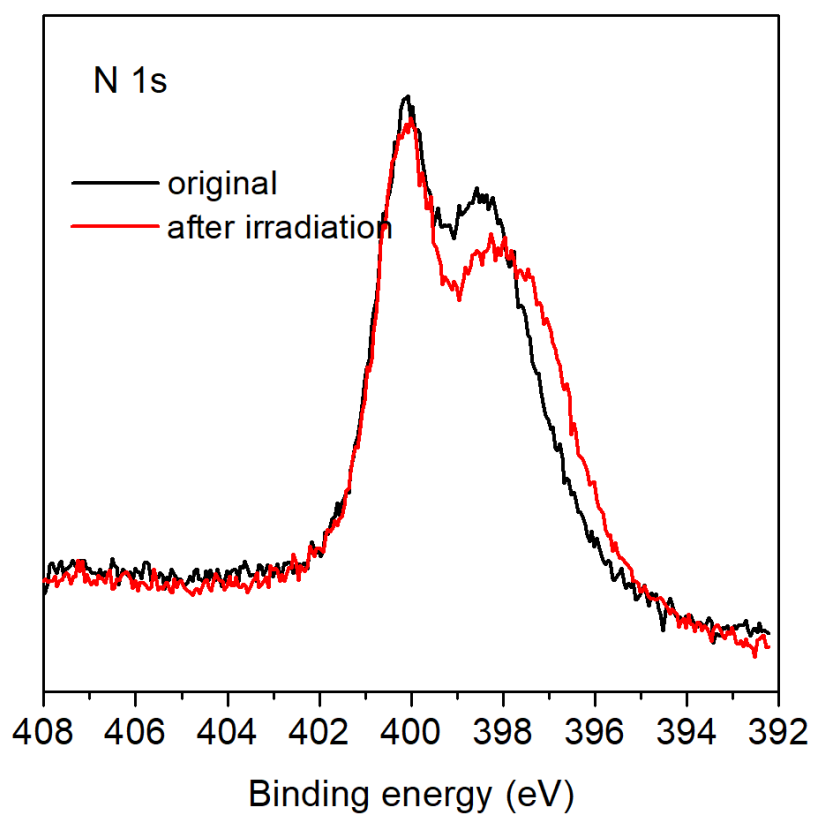

Fig. S4. N 1s XPS core-level spectra of SiMo-NDI before and after irradiation.

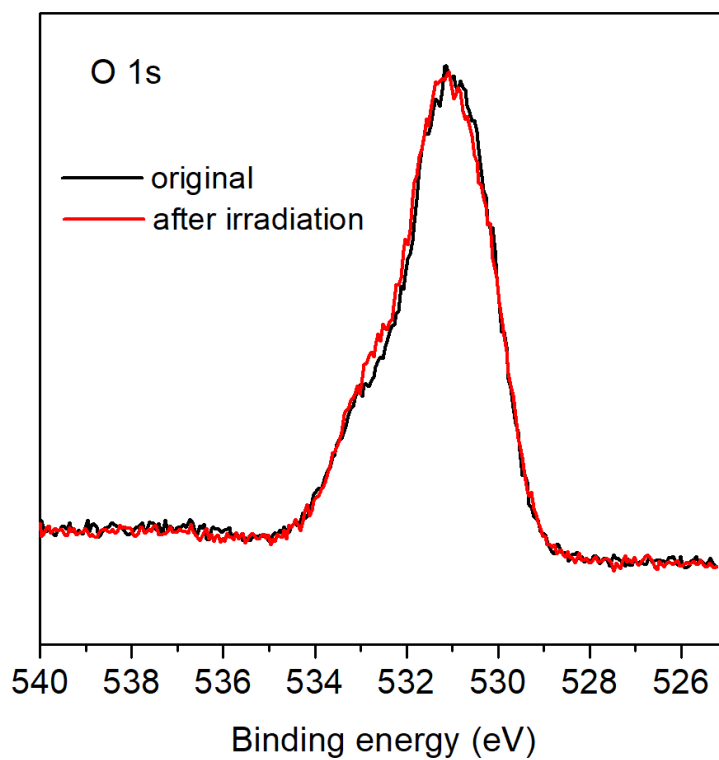

Fig. S5. O 1s XPS core-level spectra of SiMo-NDI before and after irradiation.



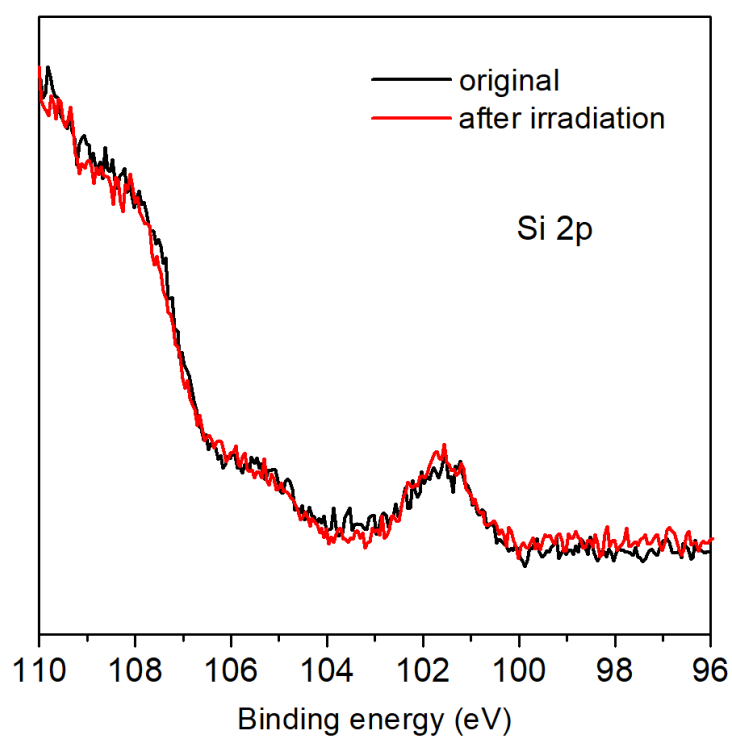

Fig. S6. Si 2p XPS core-level spectra of SiMo-NDI before and after irradiation.

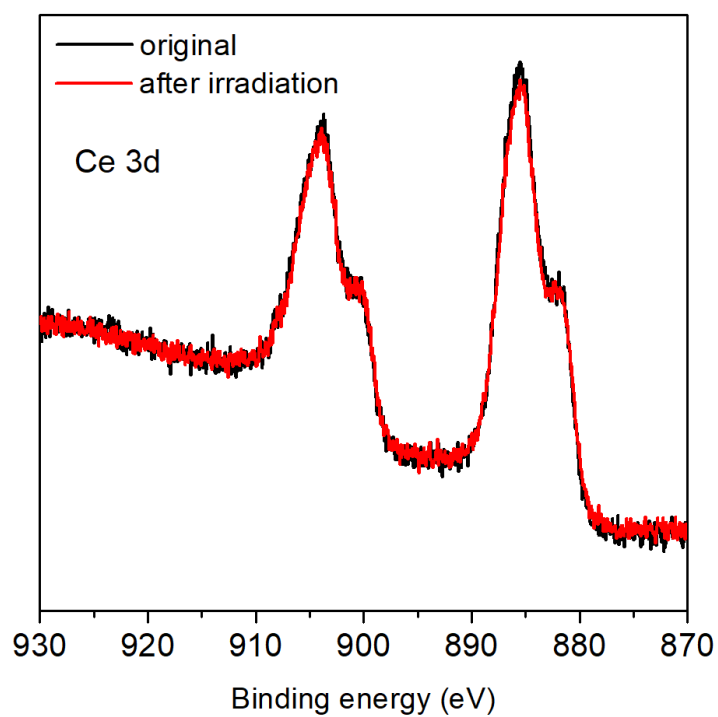

Fig. S7. Ce 3d XPS core-level spectra of SiMo-NDI before and after irradiation.

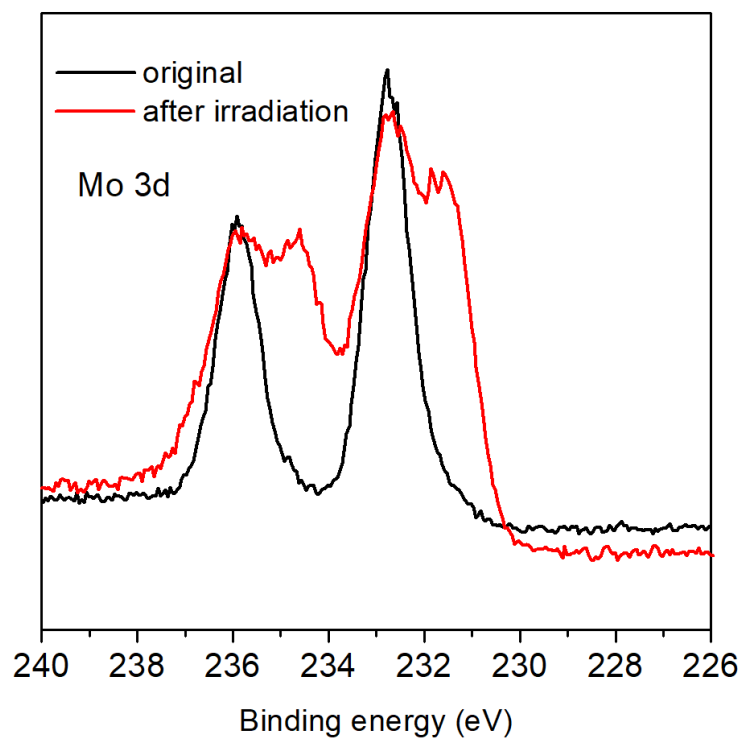

Fig. S8. Mo 3d XPS core-level spectra of SiMo-NDI before and after irradiation.

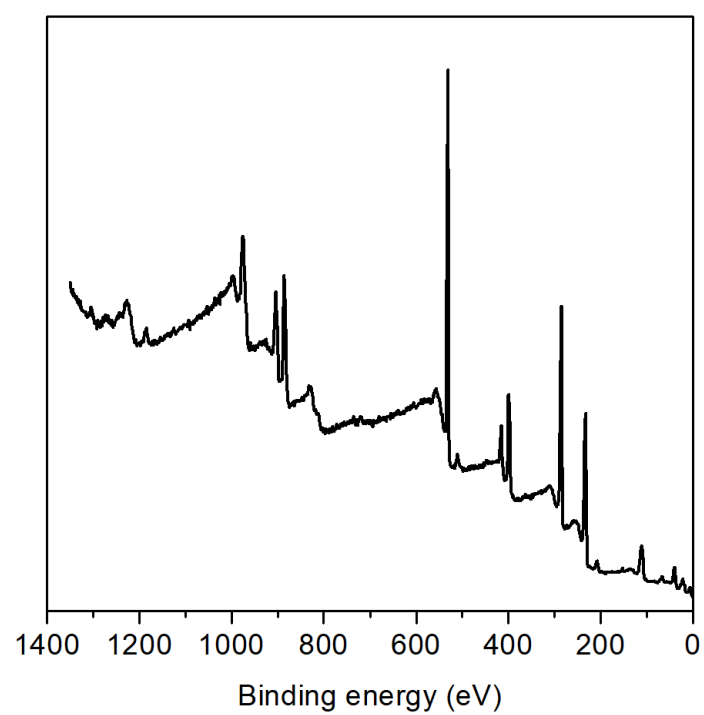

Fig. S9. Survey XPS core-level spectra of SiMo-NDI after irradiation.

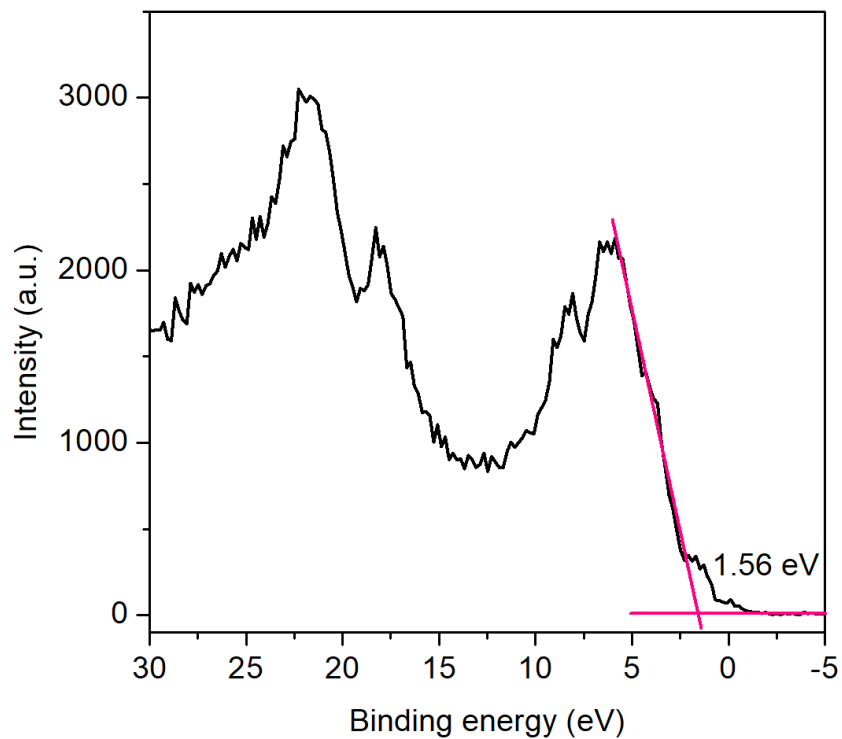

Fig. S10. The VB-XPS spectrum of the SiMo-NDI.

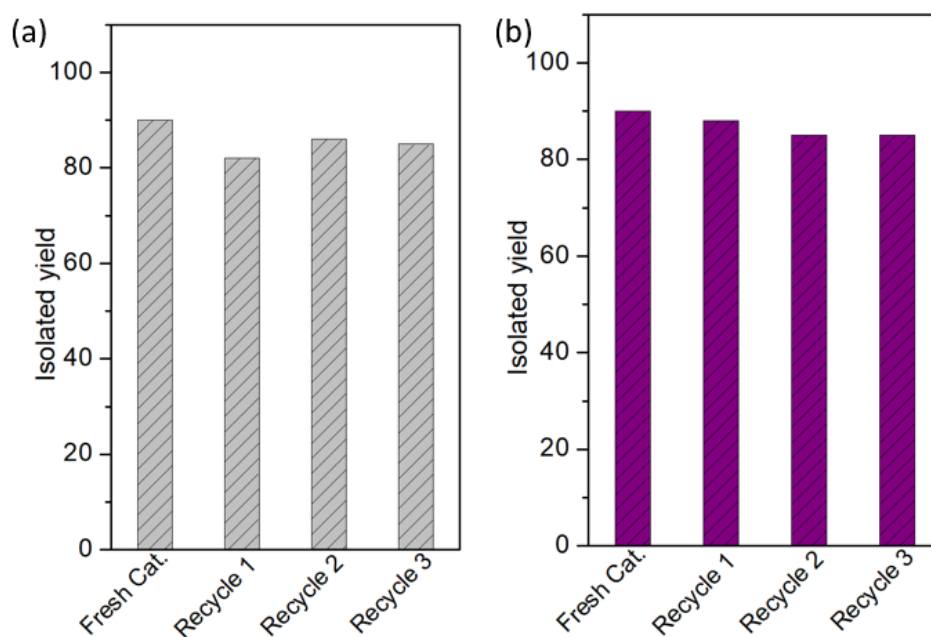

Fig. S11. Cycle performance of (a) hydroxylation of benzenboronic acid (b) C-3 thiocyanation of indole.

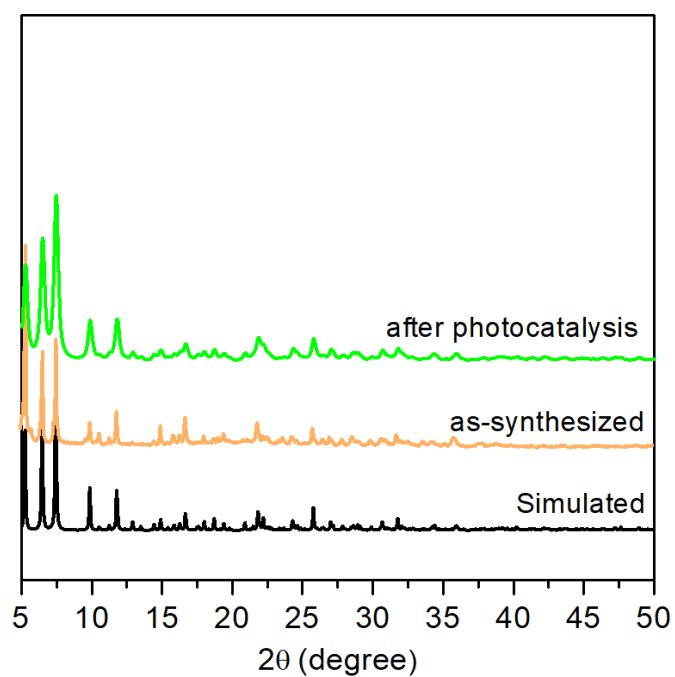

Fig. S12. The PXRD patterns of SiMo-NDI after photocatalysis.

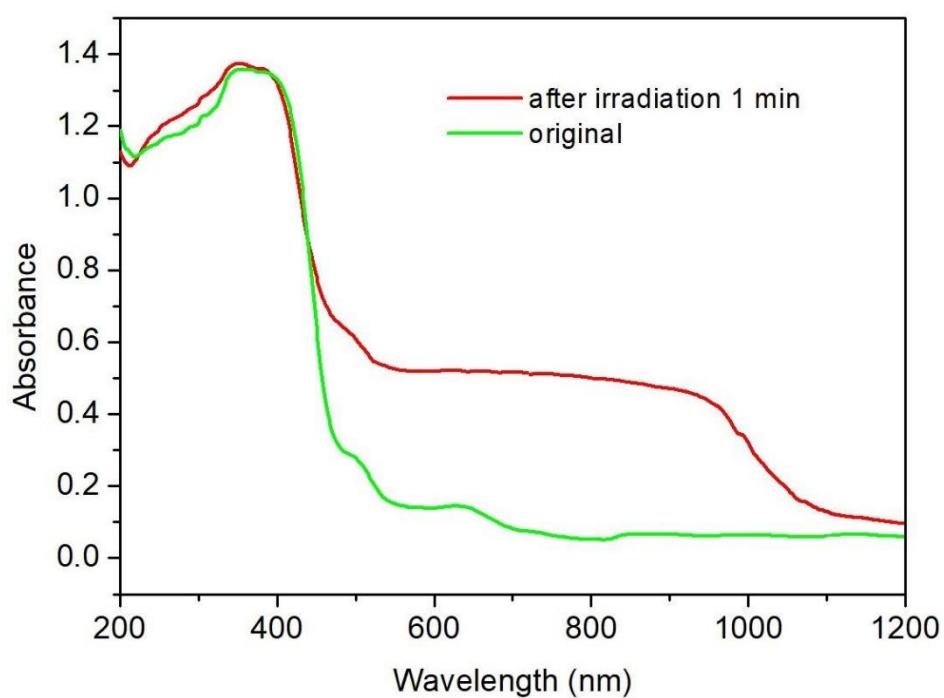

Fig. S13. Solid-state UV-Vis-NIR spectra of SiMo-NDI original and after irradiation 1 min.

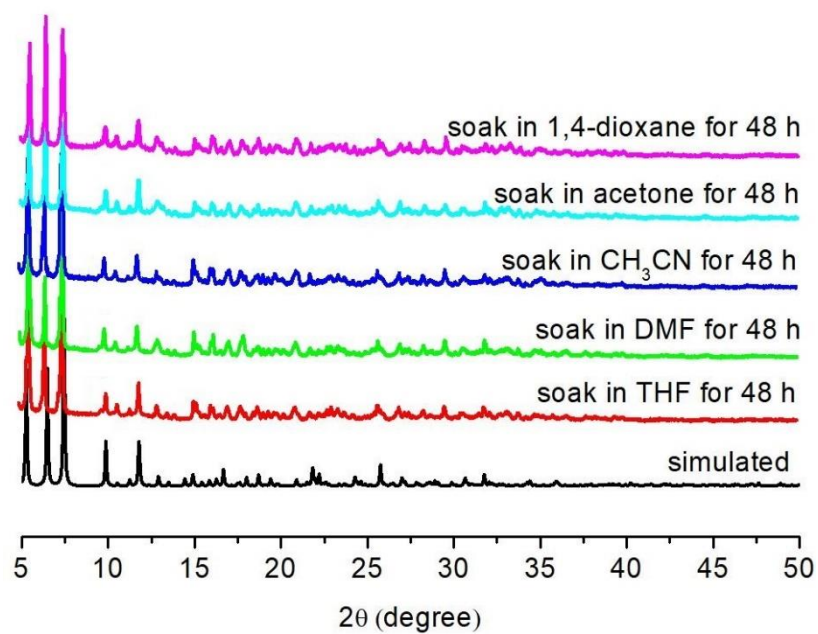

Fig. S14. PXRD patterns of SiMo-NDI treated in different solvents.

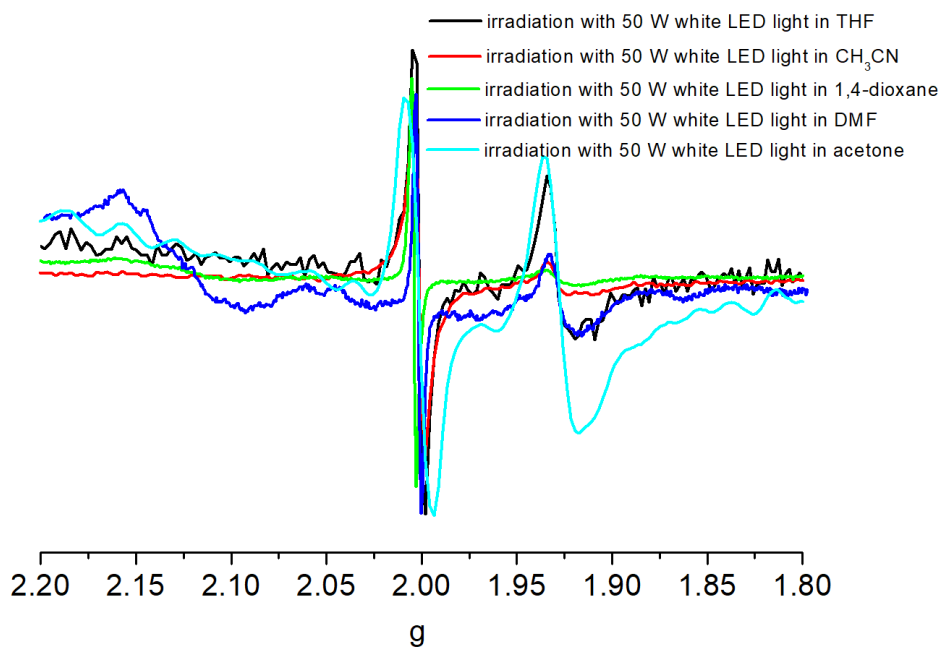

Fig. S15. EPR spectra of SiMo-NDI in different solvents with 50 W white LED light irradiation.

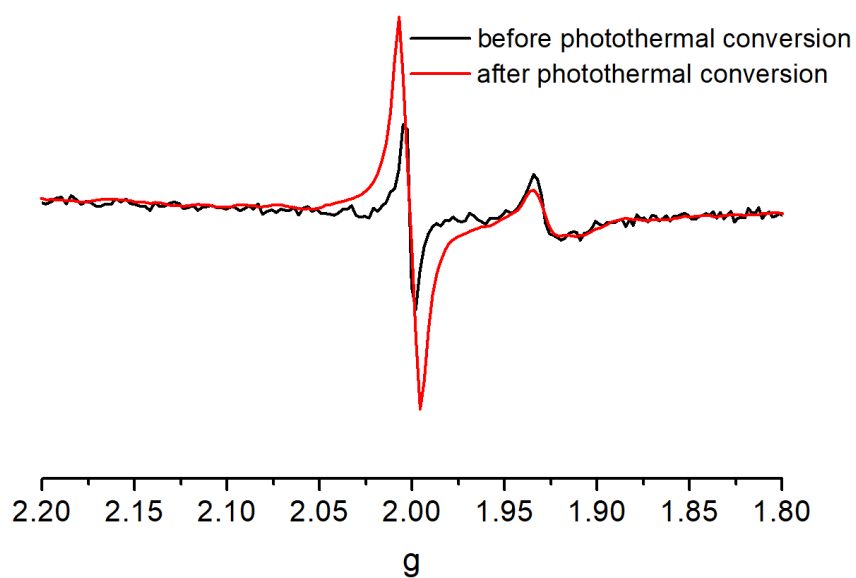

Fig. S16. EPR spectra of SiMo-NDI before and after photothermal conversion.

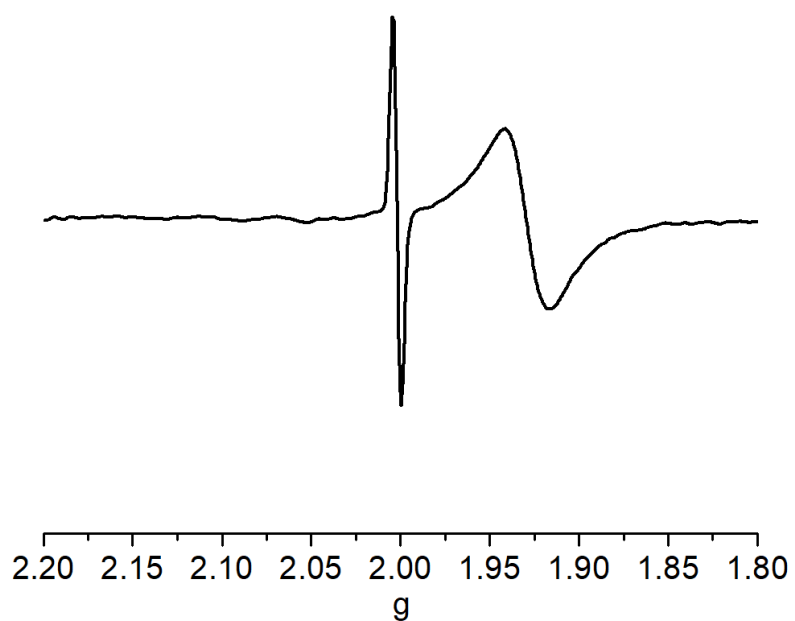

Fig. S17. EPR spectra of SiMo-NDI in DMF with phenylboronic acid and 50 W white LED light irradiation.

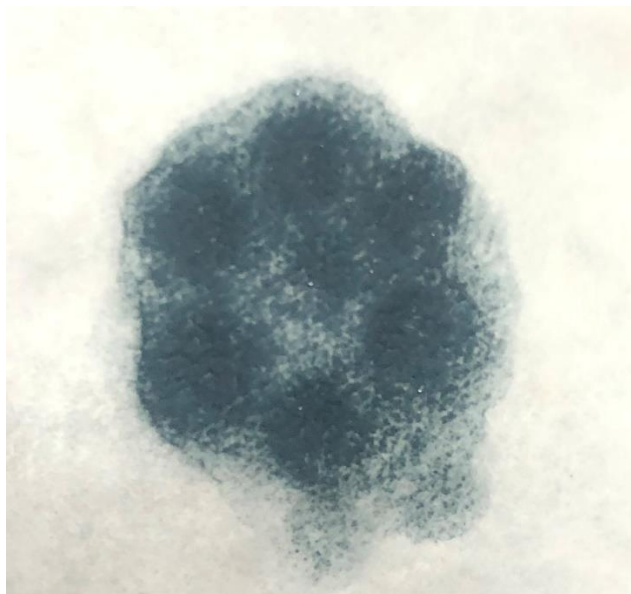

Fig. S18. Image of SiMo-NDI sample after photocatalysis.

### Photocatalytic product Characterization:

#### Phenol (**2a**)

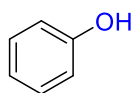

The reaction was performed following General Procedure A with **1a** (61.03 mg, 0.5 mmol). The crude material was purified by flash chromatography on silica gel to give the product **2a** (42.32 mg, 90% yield).  $^1\text{H}$  NMR (400 MHz,  $\text{DMSO-}d_6$ )  $\delta_{\text{H}}$ : 9.58 (1H, s); 7.15 (2H, t,  $J = 8.0$  Hz), 6.78-6.75(3H, m);  $^{13}\text{C}$ -NMR (100 MHz,  $\text{DMSO-}d_6$ )  $\delta_{\text{C}}$ : 157.4, 129.9, 119.6, 115.7.

#### 2-hydroxybenzonitrile (**2b**)

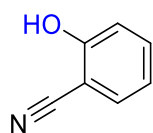

The reaction was performed following General Procedure A with **1b** (73.52 mg, 0.5 mmol). The crude material was purified by flash chromatography on silica gel to give the product **2b** (54.16 mg, 91% yield).  $^1\text{H}$  NMR (400 MHz,  $\text{DMSO-}d_6$ )  $\delta_{\text{H}}$ : 11.10 (1H, s); 7.61 (1H, d,  $J = 6.8$

Hz), 7.51 (1H, t,  $J = 7.2$  Hz), 7.04 (1H, d,  $J = 8.4$  Hz), 6.94 (1H, t,  $J = 7.6$  Hz),;  $^{13}\text{C}$  NMR (100 MHz, DMSO- $d_6$ )  $\delta_{\text{C}}$ : 160.6, 135.1, 133.7, 120.0, 117.5, 116.6, 99.3.

#### 4-Hydroxybenzonitrile (**2c**)

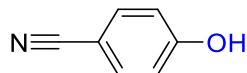

The reaction was performed following General Procedure A with **1c** (73.52 mg, 0.5 mmol). The crude material was purified by flash chromatography on silica gel to give the product **2c** (54.76 mg, 92% yield).  $^1\text{H}$  NMR (400 MHz, DMSO- $d_6$ )  $\delta_{\text{H}}$ : 10.71 (1H, s), 7.66 (2H, d,  $J = 8.8$  Hz), 6.96 (2H, d,  $J = 8.4$  Hz);  $^{13}\text{C}$  NMR (100 MHz, DMSO- $d_6$ )  $\delta_{\text{C}}$ : 162.0, 134.6, 120.0, 116.8, 101.5.

#### o-cresol (**2d**)

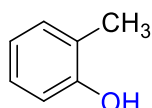

The reaction was performed following General Procedure A with **1d** (68.03 mg, 0.5 mmol). The crude material was purified by flash chromatography on silica gel to give the product **2d** (48.63 mg, 90% yield);  $^1\text{H}$  NMR (400 MHz, DMSO- $d_6$ )  $\delta_{\text{H}}$ : 9.25 (1H, s), 7.04 (1H, d,  $J = 7.2$  Hz), 6.98 (1H, td,  $J = 7.6, 1.2$  Hz), 6.76 (1H, d,  $J = 8.0$  Hz), 6.68 (1H, td,  $J = 7.6, 1.2$  Hz), 2.11 (3H, s);  $^{13}\text{C}$  NMR (100 MHz, DMSO- $d_6$ )  $\delta_{\text{C}}$ : 155.8, 131.0, 127.1, 124.2, 119.2, 115.0, 16.5.

#### m-cresol (**2e**)

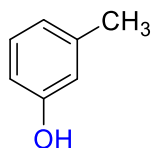

The reaction was performed following General Procedure A with **1e** (68.03 mg, 0.5 mmol). The crude material was purified by flash chromatography on silica gel to give the product **2e** (52.41 mg, 97% yield).  $^1\text{H}$  NMR (400 MHz, DMSO- $d_6$ )  $\delta_{\text{H}}$ : 9.27 (1H, s), 7.10 (1H, t,  $J = 8.0$  Hz), 6.72 (1H, dd,  $J = 8.0$  Hz), 6.68 (1H, dd,  $J = 8.0$  Hz), 6.65 (1H, dd,  $J = 8.0$ ), 2.27 (3H, s);



$^{13}\text{C}$  NMR (100 MHz,  $\text{DMSO-}d_6$ )  $\delta_{\text{C}}$ : 157.8, 139.2, 129.6, 120.1, 116.4, 112.9, 21.5.

### **p-cresol (2f)**

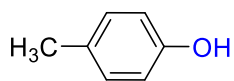

The reaction was performed following General Procedure A with **1f** (68.03 mg, 0.5 mmol).

The crude material was purified by flash chromatography on silica gel to give the product **2f** (51.33 mg, 95% yield).  $^1\text{H}$  NMR (400 MHz,  $\text{CD}_3\text{OD}$ )  $\delta_{\text{H}}$ : 6.96 (2H, m), 6.66 (2H, m), 2.20 (3H, s);  $^{13}\text{C}$  NMR (100 MHz,  $\text{CD}_3\text{OD}$ )  $\delta_{\text{C}}$ : 155.9, 130.8, 116.0, 129.6, 20.5.

### **2,5-dimethylphenol (2g)**

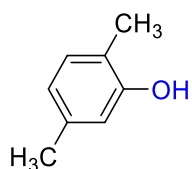

The reaction was performed following General Procedure A with **1g** (75.04 mg, 0.5 mmol).

The crude material was purified by flash chromatography on silica gel to give the product **2g** (57.98 mg, 95% yield).  $^1\text{H}$  NMR (400 MHz,  $\text{DMSO-}d_6$ )  $\delta_{\text{H}}$ : 9.10 (1H, s), 6.90 (1H, d,  $J = 7.6$  Hz), 6.57 (1H, s), 6.48 (1H, d,  $J = 7.6$  Hz), 2.17 (3H, s), 2.05 (3H, s);  $^{13}\text{C}$  NMR (100 MHz,  $\text{DMSO-}d_6$ )  $\delta_{\text{C}}$ : 155.6, 136.1, 130.7, 121.0, 119.8, 115.7, 21.2, 16.1.

### **3,5-dimethylphenol (2h)**

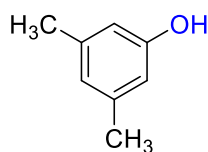

The reaction was performed following General Procedure A with **1h** (75.04 mg, 0.5 mmol).

The crude material was purified by flash chromatography on silica gel to give the product **2h** (56.15 mg, 92% yield).  $^1\text{H}$  NMR (400 MHz,  $\text{DMSO-}d_6$ )  $\delta_{\text{H}}$ : 9.15 (1H, s), 6.55 (1H, s); 6.45 (2H, d,  $J = 9.6$  Hz), 2.22 (6H, m);  $^{13}\text{C}$  NMR (100 MHz,  $\text{DMSO-}d_6$ )  $\delta_{\text{C}}$ : 157.8, 138.8, 121.1, 113.6, 21.4.

### naphthalen-2-ol (**2i**)

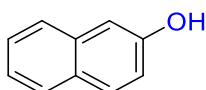

The reaction was performed following General Procedure A with **1i** (86.03 mg, 0.5 mmol). The crude material was purified by flash chromatography on silica gel to give the product **2i** (68.48 mg, 95% yield);  $^1\text{H}$  NMR (400 MHz, DMSO- $d_6$ )  $\delta_{\text{H}}$ : 9.83 (1H, s), 7.78 (1H, s); 7.76 (1H, s); 7.71 (1H, d,  $J = 8.4$  Hz), 7.40 (1H, t,  $J = 7.2$  Hz), 7.27 (1H, t,  $J = 7.2$  Hz), 7.21 (1H, s), 7.16 (1H, d,  $J = 8.8$  Hz);  $^{13}\text{C}$  NMR (100 MHz, DMSO- $d_6$ )  $\delta_{\text{C}}$ : 155.8, 135.1, 129.8, 128.2, 128.0, 126.6, 126.5, 123.1, 119.1, 109.2.

### [1,1'-biphenyl]-4,4'-diol (**2j**)

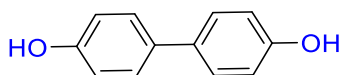

The reaction was performed following General Procedure A with **1j** (121.05 mg, 0.5 mmol). The crude material was purified by flash chromatography on silica gel to give the product **2j** (83.73 mg, 90% yield).  $^1\text{H}$  NMR (400 MHz, CD $_3$ OD)  $\delta_{\text{H}}$ : 7.35 (4H, m), 6.81 (4H, m);  $^{13}\text{C}$  NMR (100 MHz, CD $_3$ OD)  $\delta_{\text{C}}$ : 157.3, 133.9, 128.4, 116.4.

### [1,1'-biphenyl]-3-ol (**2k**)

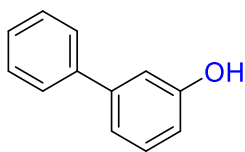

The reaction was performed following General Procedure A with **1k** (99.04 mg, 0.5 mmol). The crude material was purified by flash chromatography on silica gel to give the product **2k** (79.08 mg, 93% yield).  $^1\text{H}$  NMR (400 MHz, DMSO- $d_6$ )  $\delta_{\text{H}}$ : 9.57 (1H, s), 7.59 (2H, d,  $J = 7.6$  Hz), 7.45 (2H, d,  $J = 7.6$  Hz), 7.35 (1H, t,  $J = 7.2$  Hz), 7.26 (1H, t,  $J = 8.0$  Hz), 7.06 (1H, d,  $J = 8.0$  Hz), 7.01 (1H, s), 6.77 (1H, dd,  $J = 8.0, 2.4$  Hz);  $^{13}\text{C}$  NMR (100 MHz, DMSO- $d_6$ )  $\delta_{\text{C}}$ : 158.3, 142.1, 140.8, 130.4, 129.3, 127.9, 127.1, 117.9, 114.9, 113.9.

### [1,1'-biphenyl]-4-ol (**2l**)

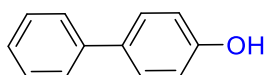

The reaction was performed following General Procedure A with **1l** (99.04 mg, 0.5 mmol). The crude material was purified by flash chromatography on silica gel to give the product **2l** (79.08 mg, 93% yield). <sup>1</sup>H NMR (400 MHz, DMSO-*d*<sub>6</sub>) δ<sub>H</sub>: 9.58 (1H, s), 7.57 (2H, d, *J* = 7.6 Hz), 7.49 (2H, d, *J* = 8.8 Hz), 7.41 (2H, t, *J* = 7.2 Hz), 7.27 (1H, t, *J* = 7.2 Hz), 6.85 (2H, d, *J* = 8.8 Hz); <sup>13</sup>C NMR (100 MHz, DMSO-*d*<sub>6</sub>) δ<sub>C</sub>: 157.6, 140.7, 131.4, 129.3, 128.2, 126.8, 126.4, 116.2.

### 4-Methoxyphenol (**2m**)

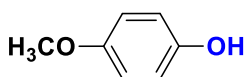

The reaction was performed following General Procedure A with **1m** (76.03 mg, 0.5 mmol). The crude material was purified by flash chromatography on silica gel to give the product **2m** (58.30 mg, 94% yield). <sup>1</sup>H NMR (400 MHz, DMSO-*d*<sub>6</sub>) δ<sub>H</sub>: 8.97 (1H, s), 6.77 (2H, m), 6.76 (2H, m), 3.66 (3H, s); <sup>13</sup>C NMR (100 MHz, DMSO-*d*<sub>6</sub>) δ<sub>C</sub>: 152.6, 151.6, 116.2, 115.0, 55.6.

### 2-Hydroxybenzaldehyde (**2n**)

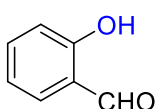

The reaction was performed following General Procedure A with **1n** (75.02 mg, 0.5 mmol). The crude material was purified by flash chromatography on silica gel to give the product **2n** (59.19 mg, 97% yield). <sup>1</sup>H NMR (400 MHz, DMSO-*d*<sub>6</sub>) δ<sub>H</sub>: 10.81; 7.61 (1H, d, *J* = 4.0 Hz); 7.42 (1H, m); 6.97 (1H, d, *J* = 8.0 Hz); 6.88 (1H, m) <sup>13</sup>C NMR (100 MHz, DMSO-*d*<sub>6</sub>) δ<sub>C</sub>: 193.8, 161.2, 136.7, 119.8, 117.5.

### 3-Hydroxybenzaldehyde (**2o**)

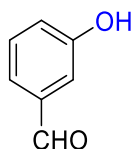

The reaction was performed following General Procedure A with **1o** (75.02 mg, 0.5 mmol). The crude material was purified by flash chromatography on silica gel to give the product **2o** (56.14 mg, 92% yield).  $^1\text{H}$  NMR (400 MHz, DMSO- $d_6$ )  $\delta_{\text{H}}$ : 9.98 (1H, s), 9.91 (1H, d,  $J = 3.6$  Hz), 7.37 (2H, m), 7.27 (1H, m), 7.11 (1H, m);  $^{13}\text{C}$  NMR (100 MHz, DMSO- $d_6$ )  $\delta_{\text{C}}$ : 193.5, 158.4, 138.1, 130.7, 122.3, 121.5, 115.1.

#### 4-Hydroxybenzaldehyde (**2p**)

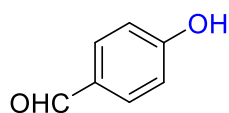

The reaction was performed following General Procedure A with **1p** (75.02 mg, 0.5 mmol). The crude material was purified by flash chromatography on silica gel to give the product **2p** (57.36 mg, 94% yield).  $^1\text{H}$  NMR (400 MHz, DMSO- $d_6$ )  $\delta_{\text{H}}$ : 9.81 (1H, s); 7.78 (2H, m); 6.96 (2H, m);  $^{13}\text{C}$  NMR (100 MHz, DMSO- $d_6$ )  $\delta_{\text{C}}$ : 191.4, 163.8, 132.6, 128.8, 116.3.

#### 3-thiocyanato-1H-indole (**5a**)

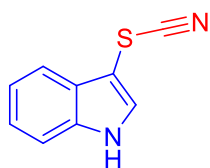

The reaction was performed following General Procedure B with 1H-indole (**3a**) (58.53 mg, 0.5 mmol). The crude material was purified by flash chromatography on silica gel to give the product **5a** (81.79 mg, 94% yield).  $^1\text{H}$  NMR (400 MHz, DMSO- $d_6$ )  $\delta_{\text{H}}$ : 12.03 (1H, s), 8.00 (1H, d,  $J = 4.0$  Hz), 7.66 (1H, m), 7.54 (1H, m), 7.31-7.24 (2H, m);  $^{13}\text{C}$  NMR (100 MHz, DMSO- $d_6$ )  $\delta_{\text{C}}$ : 136.8, 133.7, 127.9, 123.4, 121.6, 118.2, 113.3, 112.8, 89.7.

#### 2-methyl-3-thiocyanato-1H-indole (**5b**)

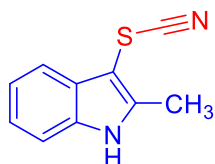

The reaction was performed following General Procedure B with 2-methyl-1*H*-indole (**3b**) (65.54 mg, 0.5 mmol). The crude material was purified by flash chromatography on silica gel to give the product **5b** (84.62 mg, 90% yield). <sup>1</sup>H NMR (400 MHz, DMSO-*d*<sub>6</sub>) δ<sub>H</sub>: 11.97 (1H, s), 7.56 (1H, t, *J* = 4.0 Hz), 7.43 (1H, m), 7.22-7.17 (2H, m), 2.54 (3H, s); <sup>13</sup>C NMR (100 MHz, DMSO-*d*<sub>6</sub>) δ<sub>C</sub>: 143.5, 135.8, 128.7, 122.7, 121.3, 117.6, 112.7, 112.3, 87.1, 12.1.

#### 2-phenyl-3-thiocyanato-1*H*-indole (**5c**)

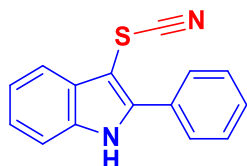

The reaction was performed following General Procedure B with 2-phenyl-1*H*-indole (**3c**) (96.54 mg, 0.5 mmol). The crude material was purified by flash chromatography on silica gel to give the product **5c** (120.03 mg, 96% yield). <sup>1</sup>H NMR (400 MHz, DMSO-*d*<sub>6</sub>) δ<sub>H</sub>: 12.42 (1H, s), 7.86 (1H, t, *J* = 1.6 Hz), 7.85 (1H, br s), 7.72 (1H, dd, *J* = 6.4, 1.6 Hz), 7.63 (2H, t, *J* = 7.6 Hz), 7.55 (2H, t, *J* = 7.6 Hz), 7.31 (2H, m); <sup>13</sup>C NMR (100 MHz, DMSO-*d*<sub>6</sub>) δ<sub>C</sub>: 143.6, 136.3, 130.4, 129.8, 129.6, 129.4, 129.3, 123.9, 121.9, 118.5, 112.9, 112.9, 87.6.

#### 4-methyl-3-thiocyanato-1*H*-indole (**5d**)

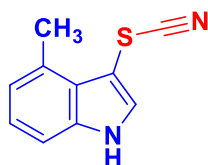

The reaction was performed following General Procedure B with 4-methyl-1*H*-indole (**3d**) (66.54 mg, 0.5 mmol). The crude material was purified by flash chromatography on silica gel to give the product **5d** (83.68 mg, 89% yield). <sup>1</sup>H NMR (400 MHz, CD<sub>3</sub>Cl) δ<sub>H</sub>: 8.54 (1H, s), 7.46 (1H, t, *J* = 4.0 Hz), 7.16 (1H, t, *J* = 8.0 Hz), 6.59 (2H, m), 2.71 (3H, s); <sup>13</sup>C NMR (100

MHz, DMSO-*d*<sub>6</sub>)  $\delta_C$ : 136.5, 132.3, 126.1, 124.0, 113.4, 123.5, 131.1, 120.9, 110.1, 19.3.

#### 5-methyl-3-thiocyanato-1H-indole (**5e**)

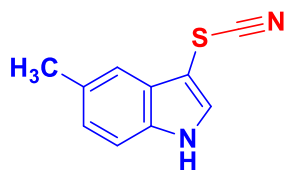

The reaction was performed following General Procedure B with 4-methyl-1H-indole (**3e**) (65.54 mg, 0.5 mmol). The crude material was purified by flash chromatography on silica gel to give the product **5e** (89.32mg, 95% yield). <sup>1</sup>H NMR (400 MHz, DMSO-*d*<sub>6</sub>)  $\delta_H$ : 11.90 (1H, s), 7.93 (1H, d, *J* = 2.8 Hz), 7.45 (1H, d, *J* = 0.8 Hz), 7.41 (1H, d, *J* = 8.0 Hz), 7.10 (1H, dd, *J* = 8.0, 1.6 Hz), 2.45 (3H, s); <sup>13</sup>C NMR (100 MHz, DMSO-*d*<sub>6</sub>)  $\delta_C$ : 135.1, 133.6, 130.5, 128.1, 125.0, 117.6, 113.0, 112.9, 88.9, 21.7.

#### 5-bromo-3-thiocyanato-1H-indole (**5f**)

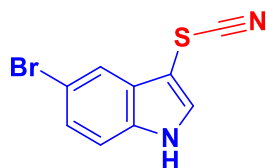

The reaction was performed following General Procedure B with 5-bromo-1H-indole (**3f**) (97.48 mg, 0.5 mmol). The crude material was purified by flash chromatography on silica gel to give the product **5f** (117.15 mg, 93% yield). 5-bromo-3-thiocyanato-1H-indole; <sup>1</sup>H NMR (400 MHz, DMSO-*d*<sub>6</sub>)  $\delta_H$ : 12.23 (1H, s), 8.07 (1H, br s), 7.82 (1H, br s), 7.52 (1H, d, *J* = 8.8 Hz), 7.41 (1H, d, *J* = 8.8 Hz); <sup>13</sup>C NMR (100 MHz, DMSO-*d*<sub>6</sub>)  $\delta_C$ : 135.6, 135.2, 129.7, 126.1, 120.4, 115.4, 114.2, 112.7, 89.9.

#### 4-methoxy-3-thiocyanato-1H-indole (**5g**)

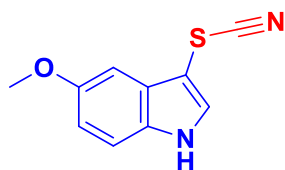

The reaction was performed following General Procedure B with 5-methoxy-1H-indole (**3g**)

(73.53 mg, 0.5 mmol). The crude material was purified by flash chromatography on silica gel to give the product **5g** (98.96 mg, 97% yield).  $^1\text{H}$  NMR (400 MHz, DMSO- $d_6$ )  $\delta_{\text{H}}$ : 8.76 (1H, s), 7.42 (1H, d,  $J = 2.8$  Hz), 7.28 (1H, d,  $J = 8.8$  Hz), 7.17 (1H, d,  $J = 2.4$  Hz), 6.93 (1H, dd,  $J = 8.8, 2.4$  Hz), 3.90 (3H, s);  $^{13}\text{C}$  NMR (100 MHz, DMSO- $d_6$ )  $\delta_{\text{C}}$ : 155.7, 131.5, 130.9, 128.5, 114.5, 113.1, 112.2, 99.8, 91.2, 55.9.

#### 6-methyl-3-thiocyanato-1H-indole (**5h**)

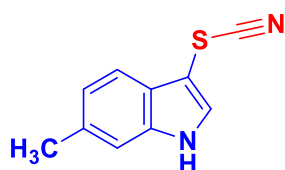

The reaction was performed following General Procedure B with 6-methyl-1H-indole (**3h**) (65.54 mg, 0.5 mmol). The crude material was purified by flash chromatography on silica gel to give the product **5h** 90.26 mg, 96% yield).  $^1\text{H}$  NMR (400 MHz, DMSO- $d_6$ )  $\delta_{\text{H}}$ : 8.67 (1H, s), 7.62 (1H, d,  $J = 8.4$  Hz), 7.27 (1H, d,  $J = 2.8$  Hz), 7.13 (1H, br s), 7.09 (1H, d,  $J = 8.4$  Hz), 2.43 (3H, s);  $^{13}\text{C}$  NMR (100 MHz, DMSO- $d_6$ )  $\delta_{\text{C}}$ : 136.5, 133.9, 130.7, 125.5, 123.7, 118.2, 112.6, 112.1, 91.3, 21.7.

#### methyl-3-thiocyanato-1H-indole (**5i**)

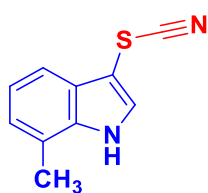

The reaction was performed following General Procedure B with 7-methyl-1H-indole (**3i**) (65.54 mg, 0.5 mmol). The crude material was purified by flash chromatography on silica gel to give the product **5i** (88.38 mg, 94% yield).  $^1\text{H}$  NMR (400 MHz, DMSO- $d_6$ )  $\delta_{\text{H}}$ : 8.61 (1H, s), 7.64 (1H, d,  $J = 8.0$  Hz), 7.50 (1H, d,  $J = 2.8$  Hz), 7.23 (1H, m), 7.11 (1H, d,  $J = 7.2$  Hz), 2.49 (3H, s);  $^{13}\text{C}$  NMR (100 MHz, DMSO- $d_6$ )  $\delta_{\text{C}}$ : 135.6, 130.6, 127.3, 124.4, 122.1, 121.4, 116.4, 112.0, 92.7, 16.4.

## NMR Spectra

### 2a: phenol

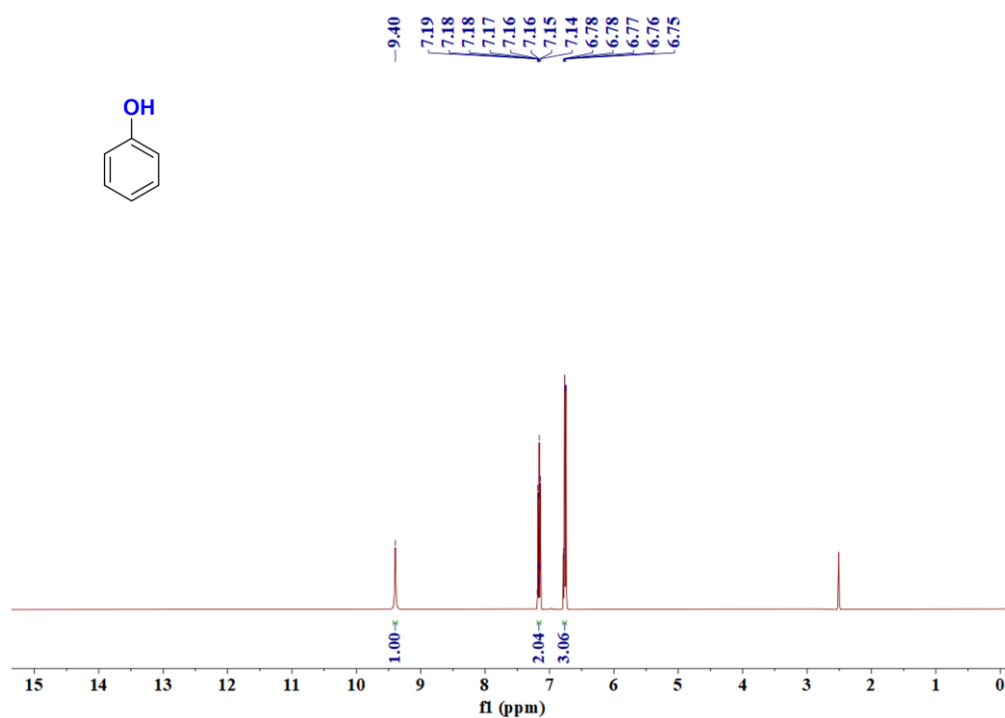

Fig. S19.  $^1\text{H}$  NMR spectra (400 MHz,  $\text{DMSO-}d_6$ ) of 2a.

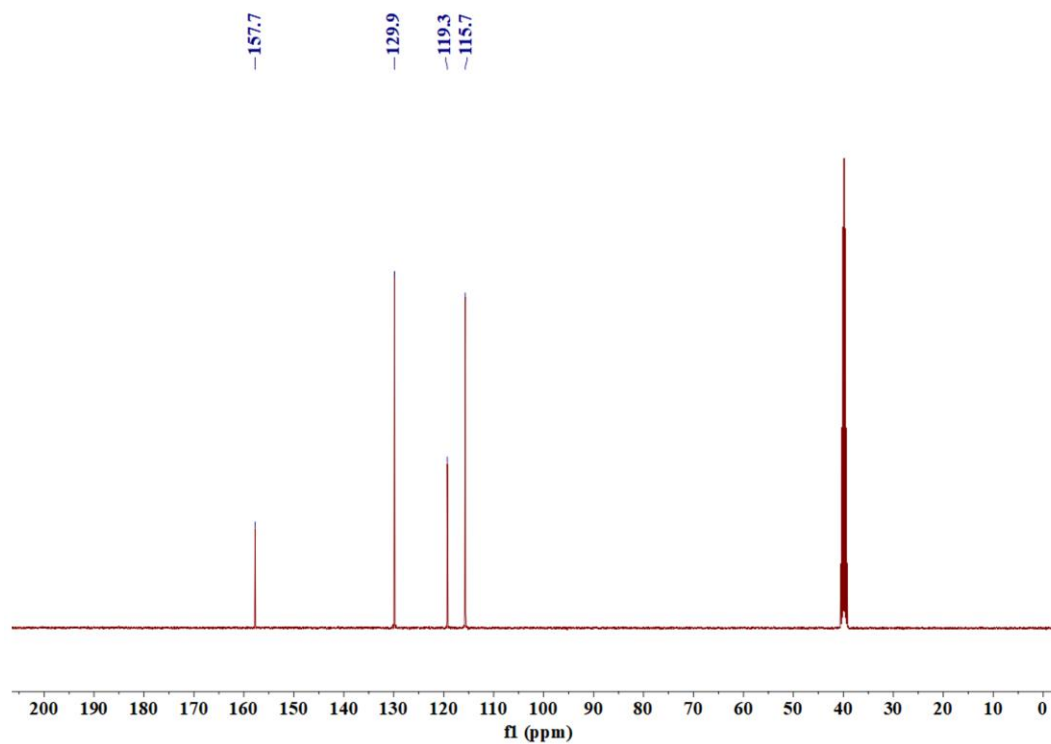

Fig. S20.  $^{13}\text{C}$  NMR spectra (100 MHz,  $\text{DMSO-}d_6$ ) of 2a.



2b: 2-hydroxybenzonitrile

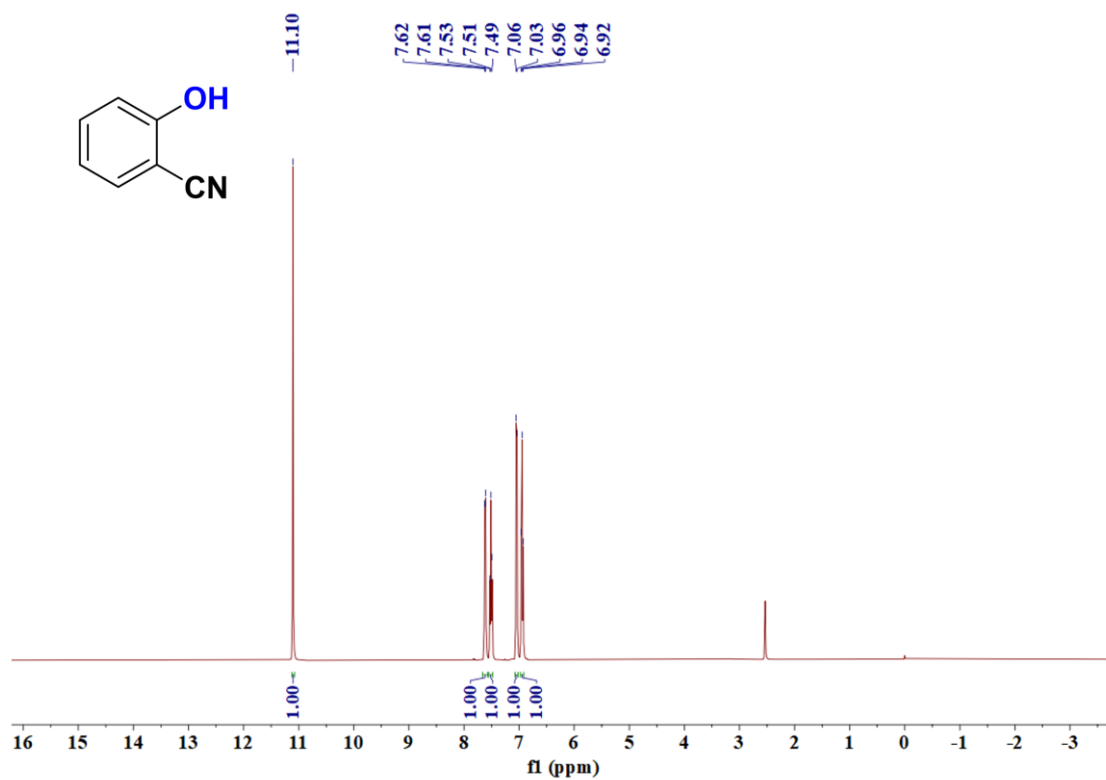

Fig. S21.  $^1\text{H}$  NMR spectra (400 MHz,  $\text{DMSO-}d_6$ ) of 2b.

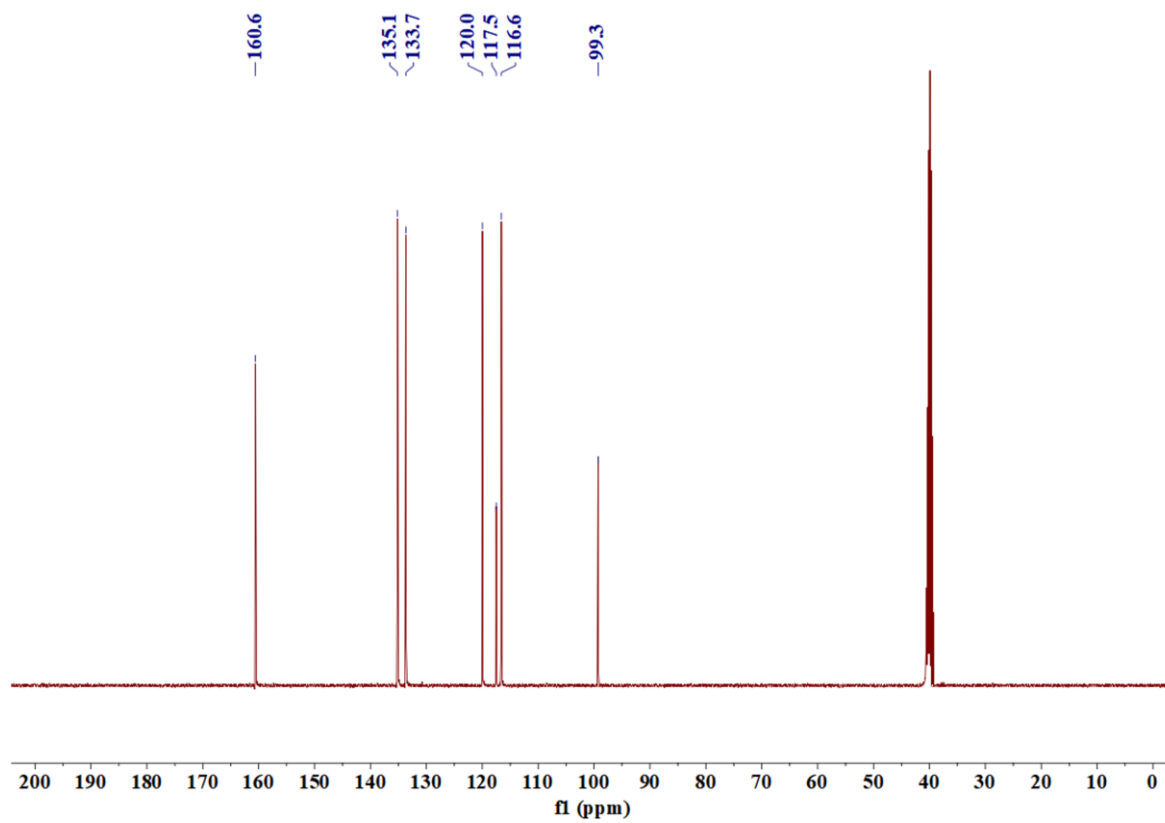

Fig. S22.  $^{13}\text{C}$  NMR spectra (100 MHz,  $\text{DMSO-}d_6$ ) of 2b.

2c: 4-hydroxybenzonitrile

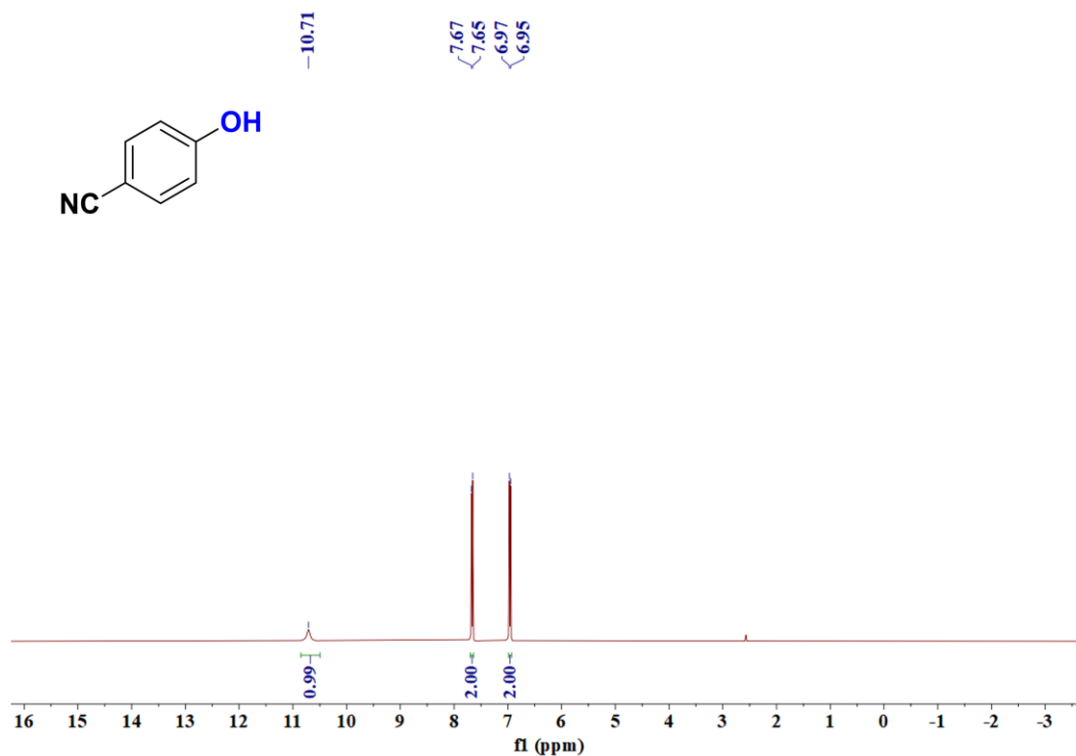

Fig. S23. <sup>1</sup>H NMR spectra (400 MHz, DMSO-*d*<sub>6</sub>) of 2c.

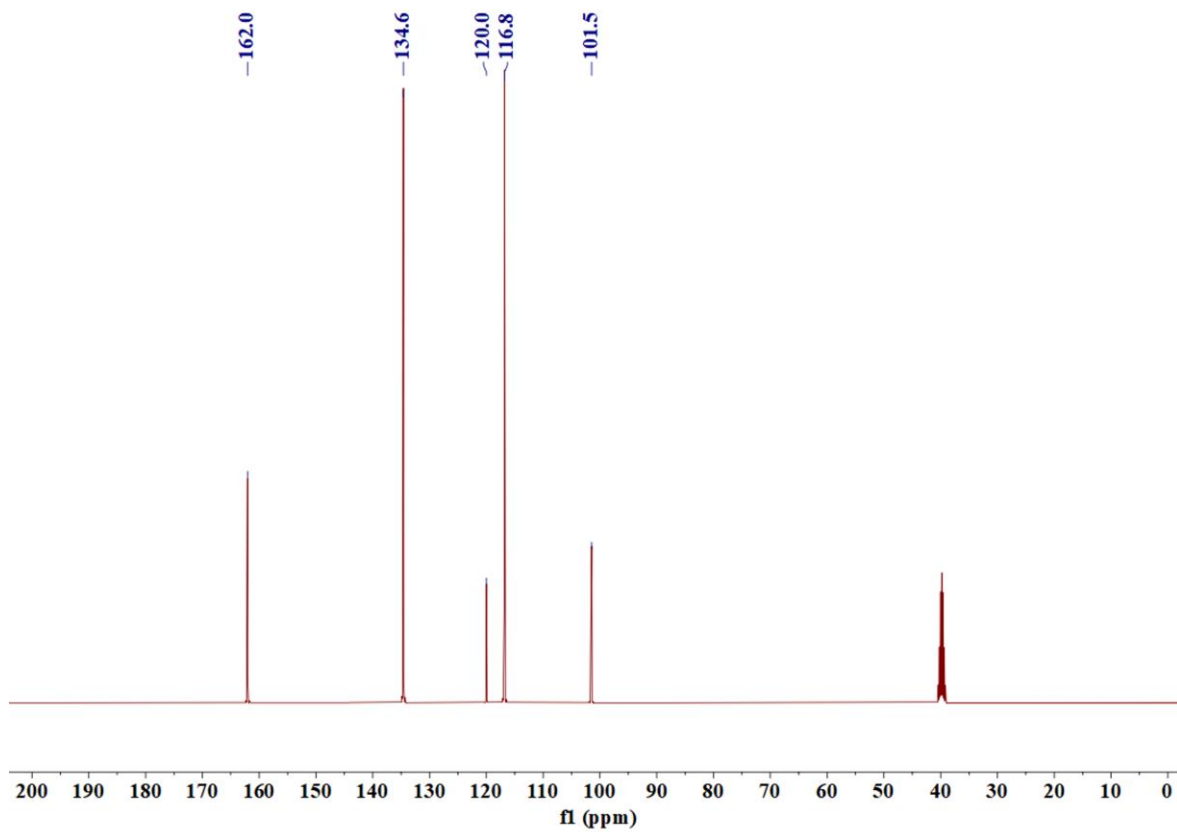

Fig. S24. <sup>13</sup>C NMR spectra (100 MHz, DMSO-*d*<sub>6</sub>) of 2c.

2d: o-cresol

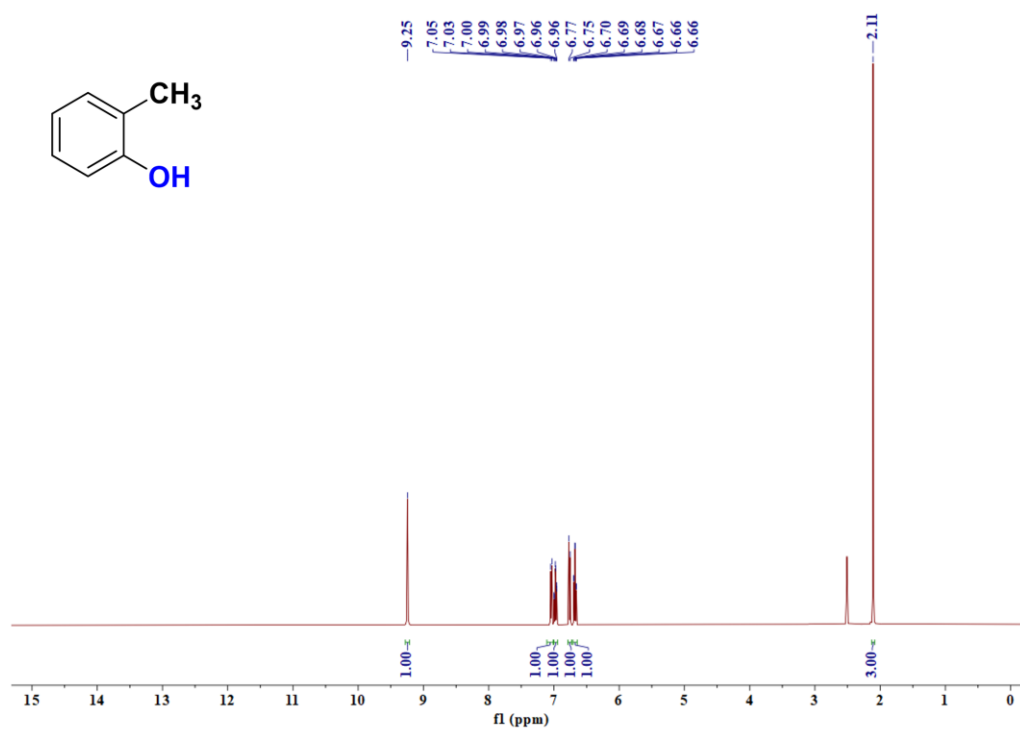

Fig. S25. <sup>1</sup>H NMR spectra (400 MHz, DMSO-*d*<sub>6</sub>) of 2d.

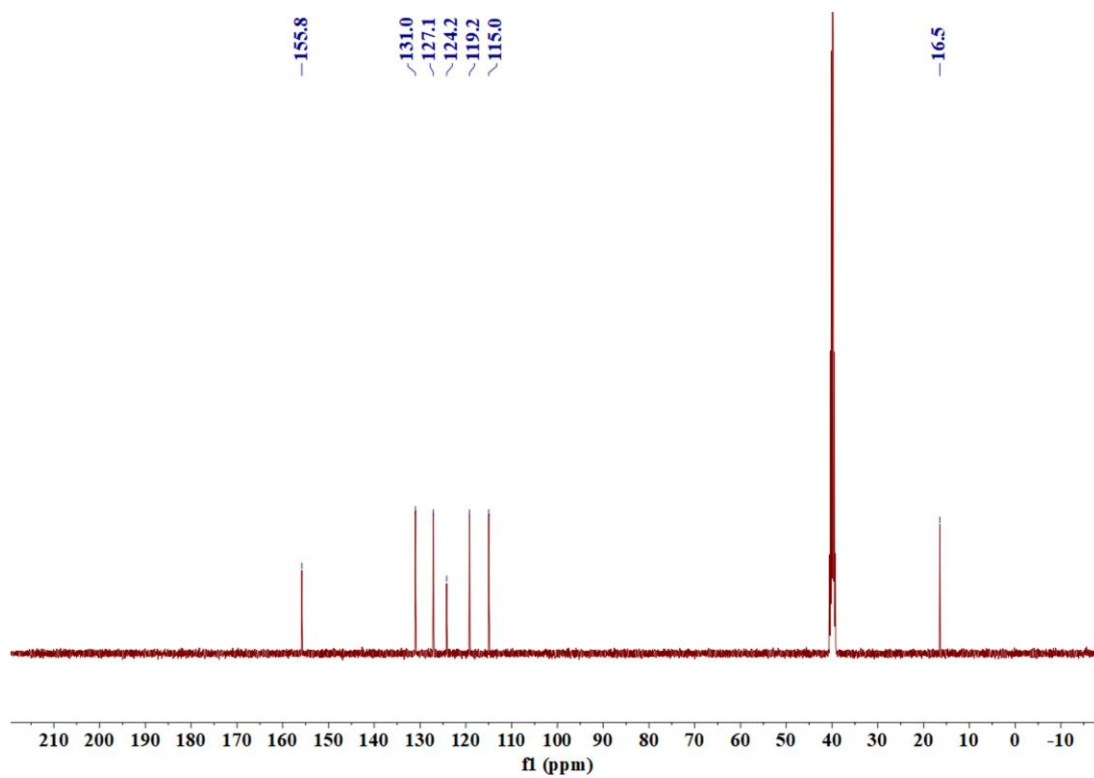

Fig. S26. <sup>13</sup>C NMR spectra (100 MHz, DMSO-*d*<sub>6</sub>) of 2d.

2e: m-cresol

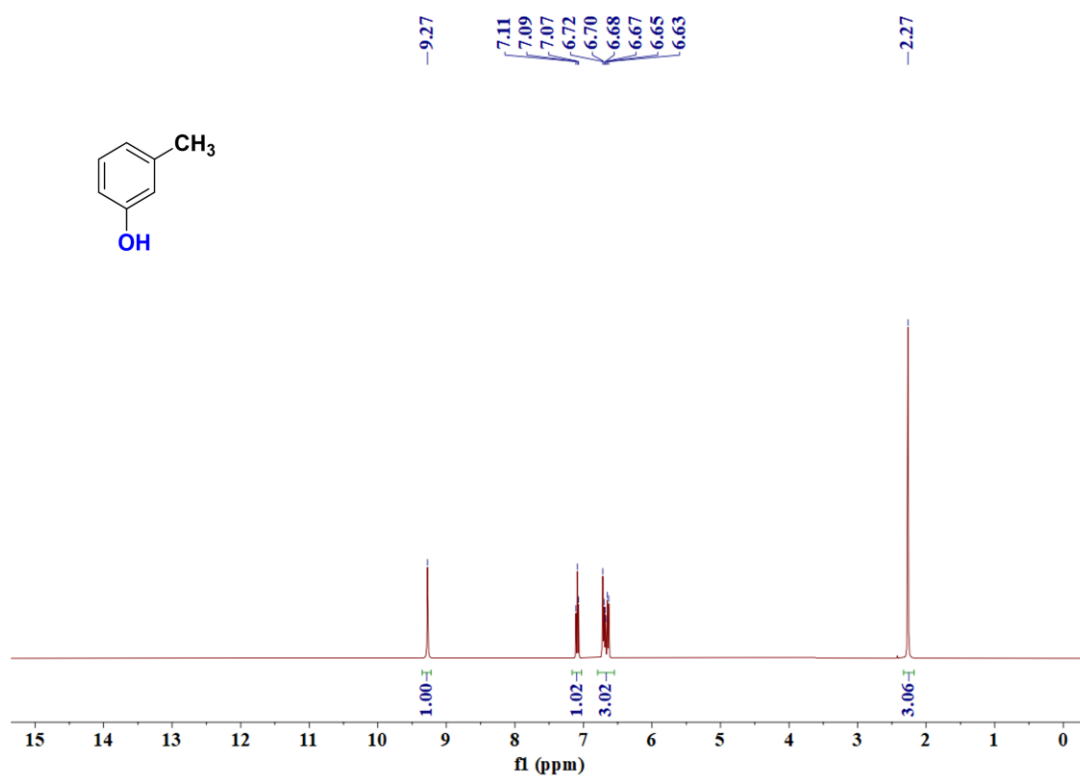

Fig. S27.  $^1\text{H}$  NMR spectra (400 MHz,  $\text{DMSO-}d_6$ ) of 2e.

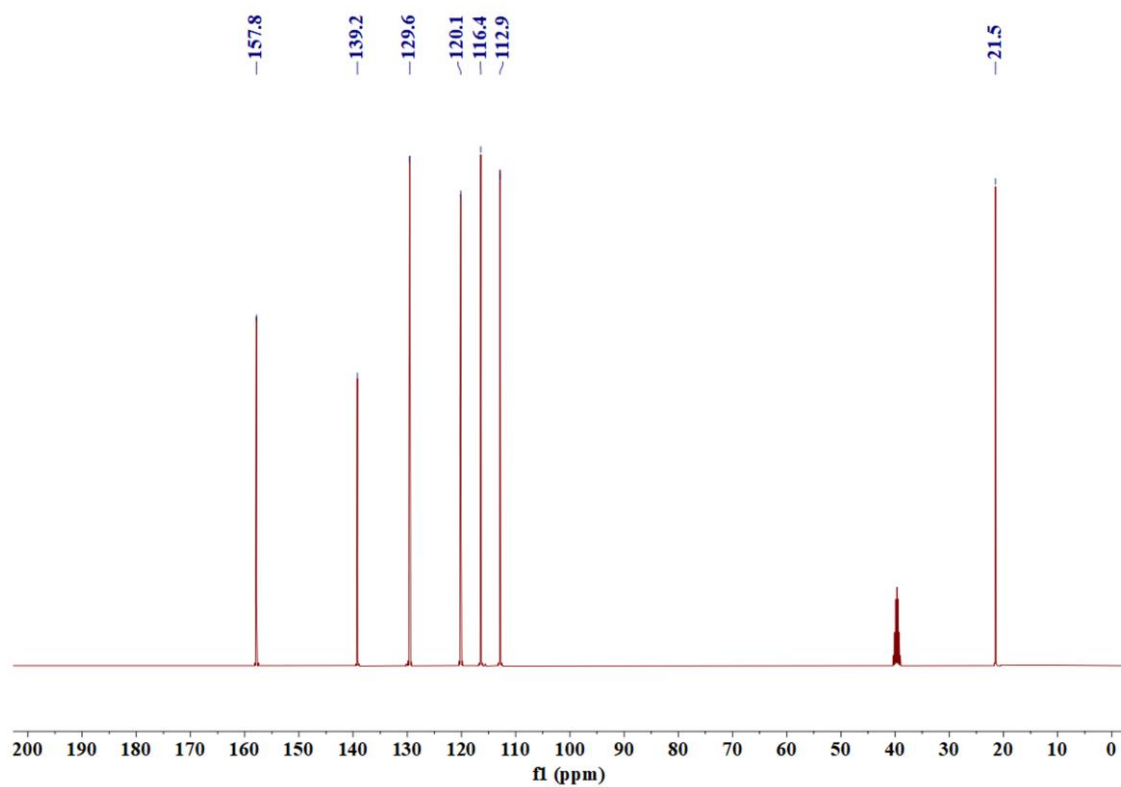

Fig. S28.  $^{13}\text{C}$  NMR spectra (100 MHz,  $\text{DMSO-}d_6$ ) of 2e.

2f: p-cresol

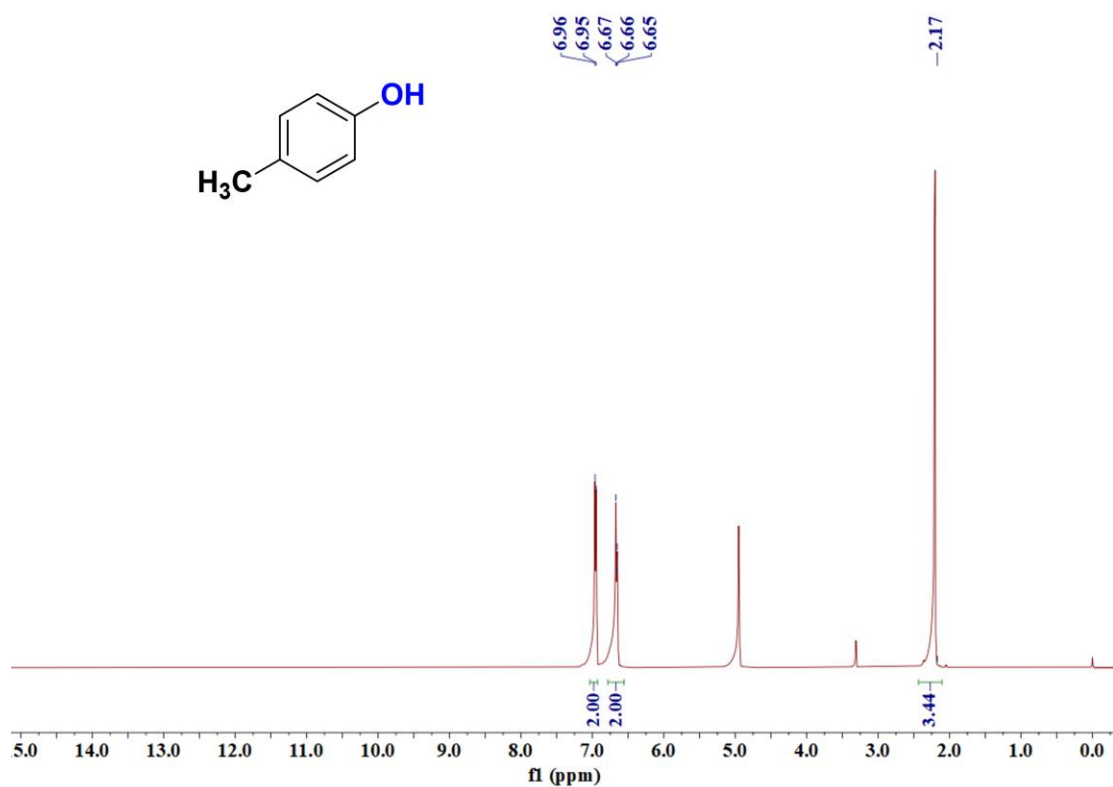

Fig. S29.  $^1\text{H}$  NMR spectra (400 MHz,  $\text{CD}_3\text{OD}$ ) of 2f.

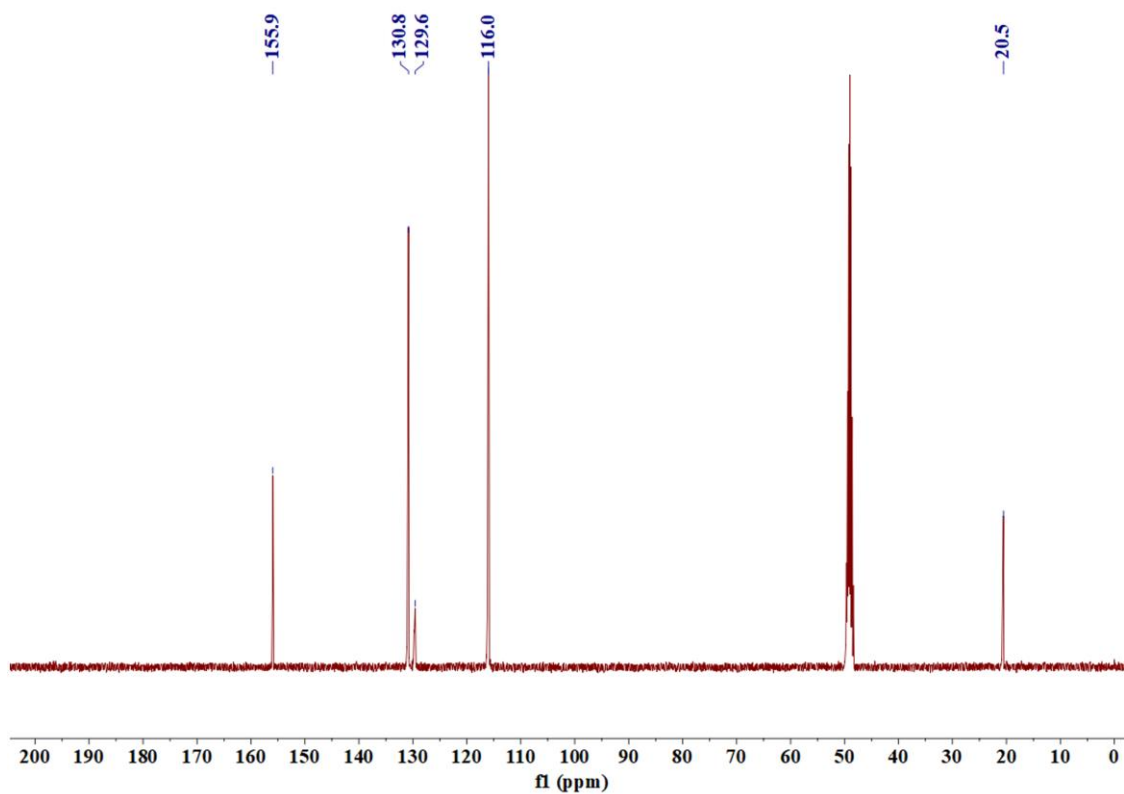

Fig. S30.  $^{13}\text{C}$  NMR spectra (100 MHz,  $\text{CD}_3\text{OD}$ ) of 2f.

2g: 2,5-dimethylphenol

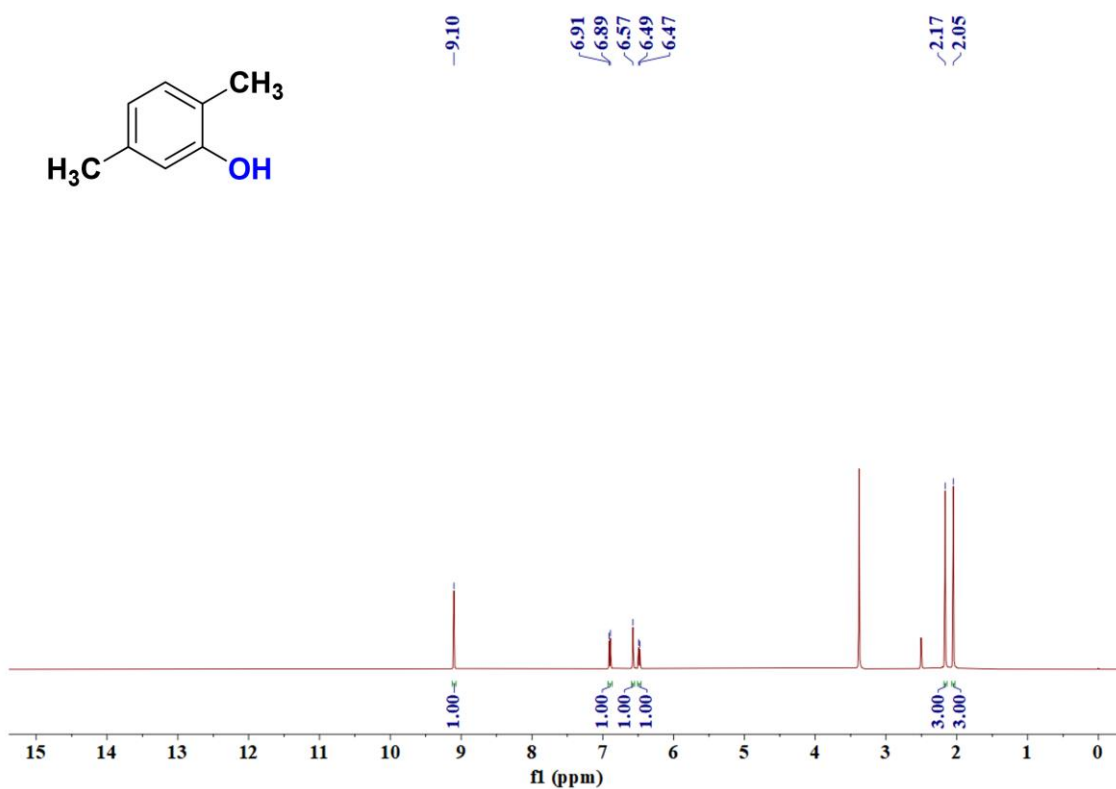

Fig. S31. <sup>1</sup>H NMR spectra (400 MHz, DMSO-*d*<sub>6</sub>) of 2g.

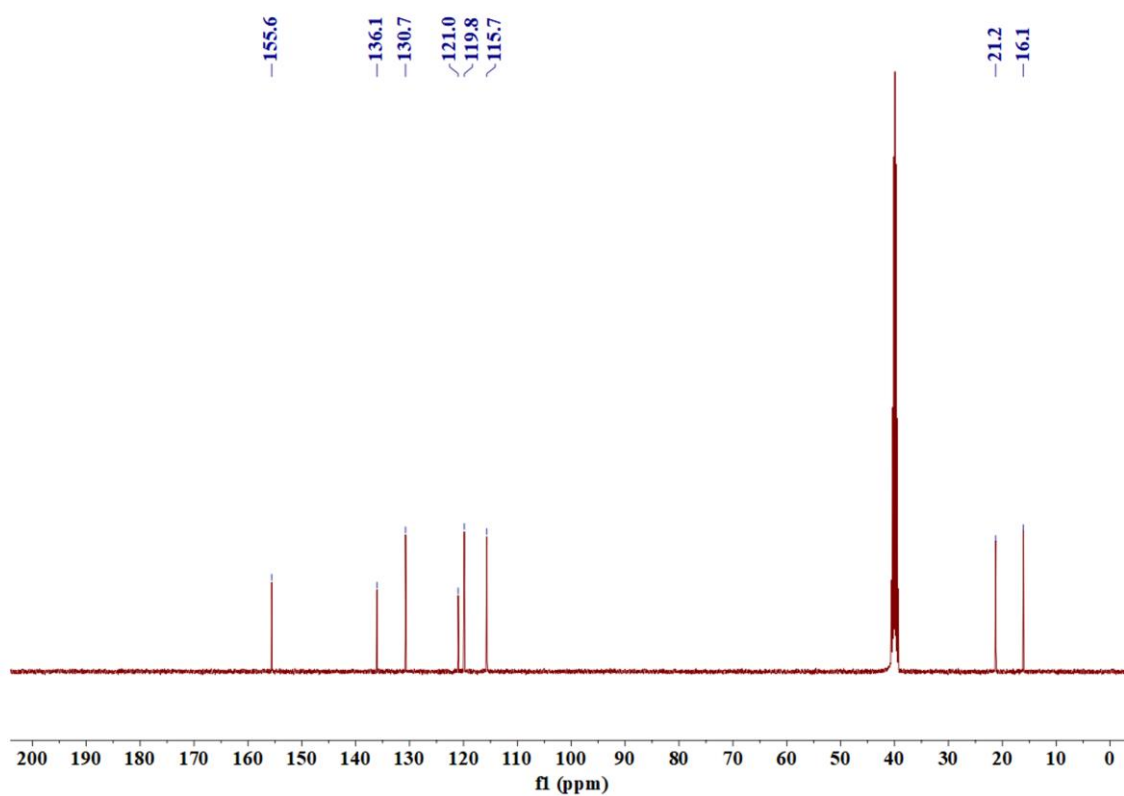

Fig. S32. <sup>13</sup>C NMR spectra (100 MHz, DMSO-*d*<sub>6</sub>) of 2g.

2h: 3,5-dimethylphenol

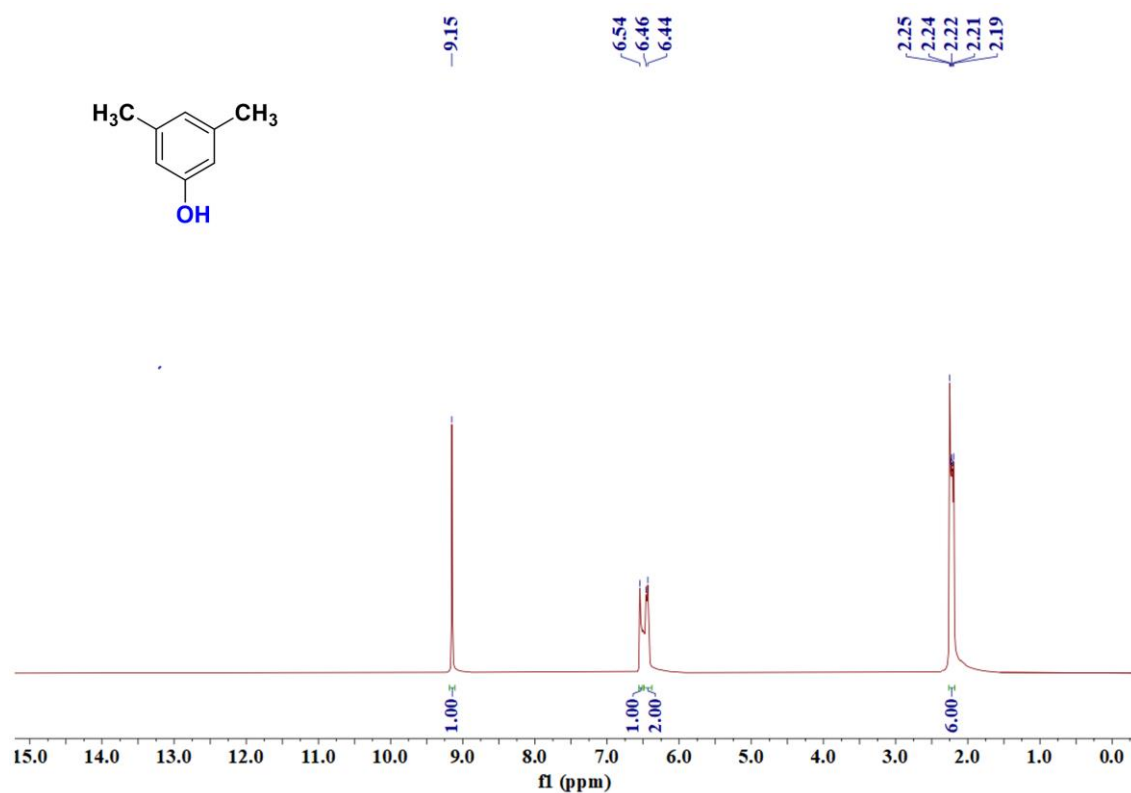

Fig. S33. <sup>1</sup>H NMR spectra (400 MHz, DMSO-*d*<sub>6</sub>) of 2h.

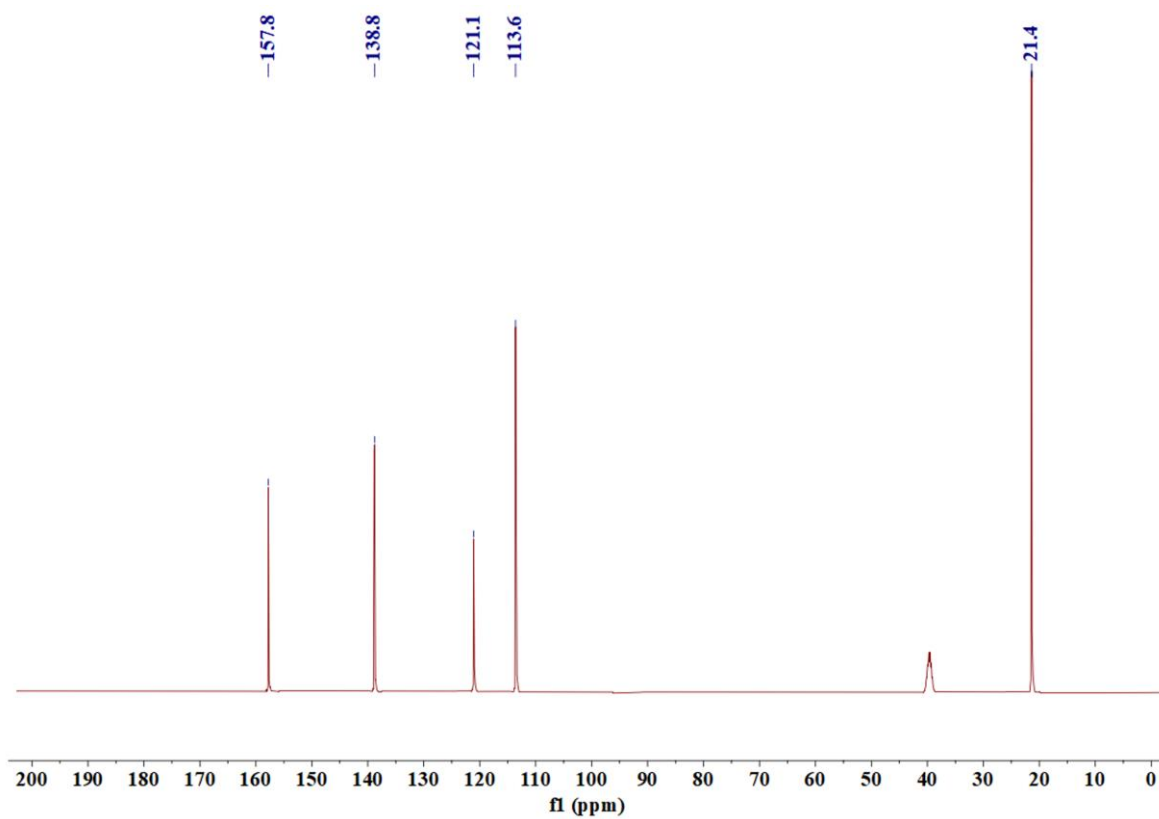

Fig. S34. <sup>13</sup>C NMR spectra (100 MHz, DMSO-*d*<sub>6</sub>) of 2h.

2i: naphthalen-2-ol

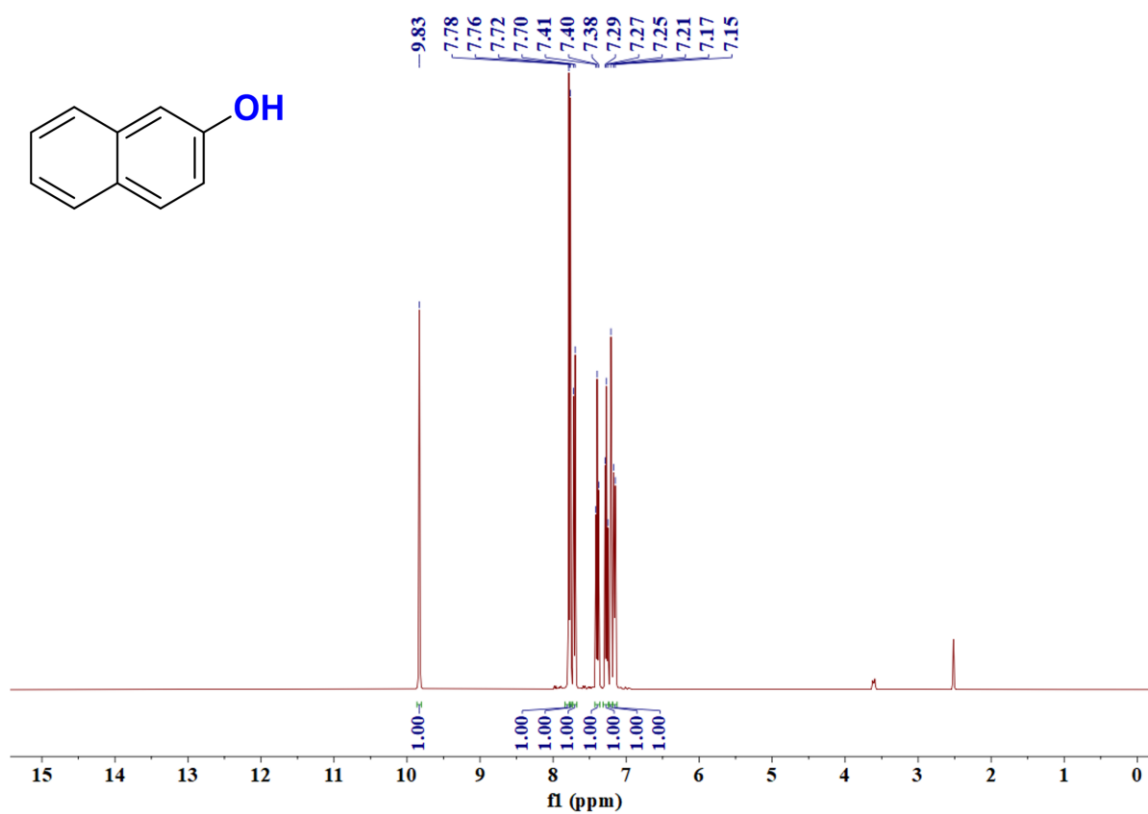

Fig. S35. <sup>1</sup>H NMR spectra (400 MHz, DMSO-*d*<sub>6</sub>) of 2i.

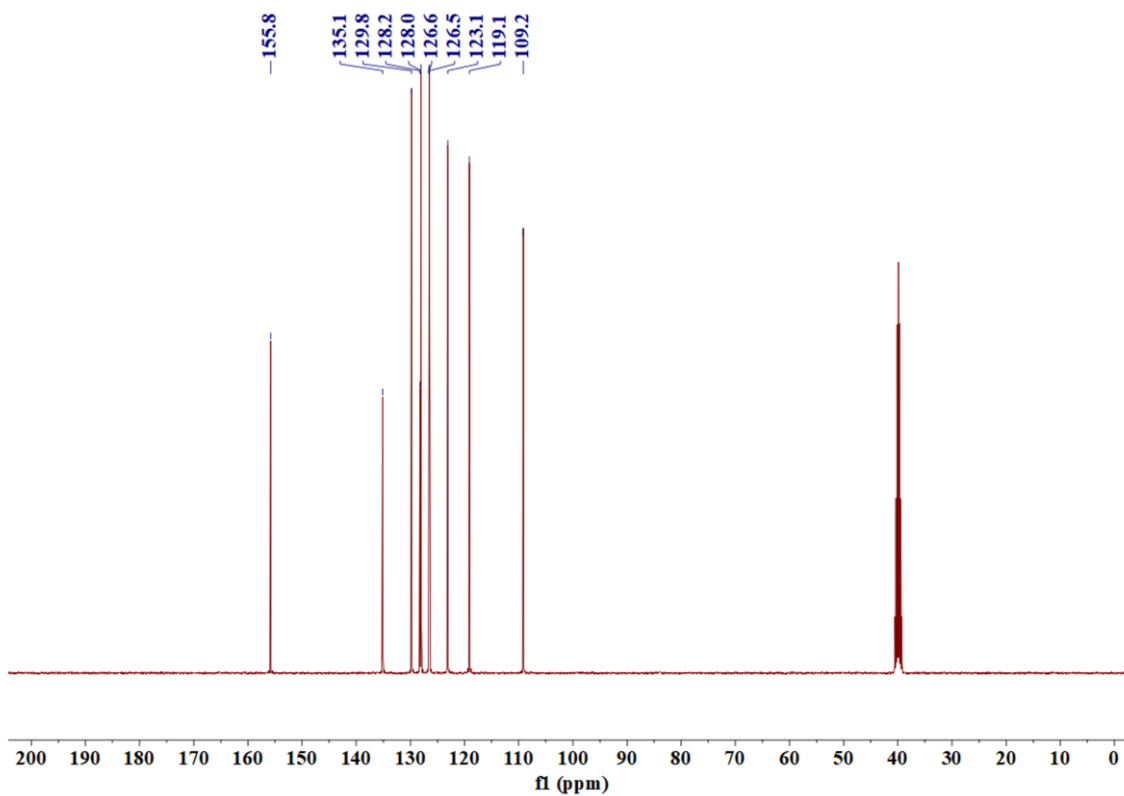

Fig. S36. <sup>13</sup>C NMR spectra (100 MHz, DMSO-*d*<sub>6</sub>) of 2i.



2j: [1,1'-biphenyl]-4,4'-diol

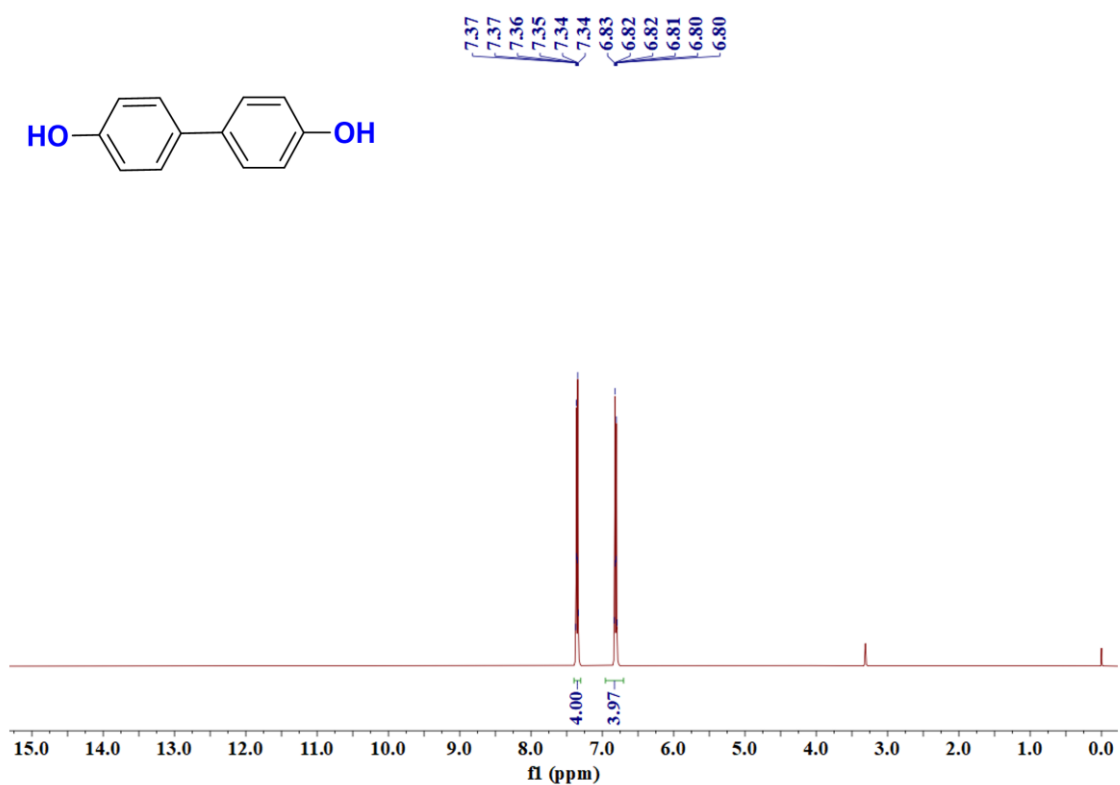

Fig. S37. <sup>1</sup>H NMR spectra (400 MHz, CD<sub>3</sub>OD) of 2j.

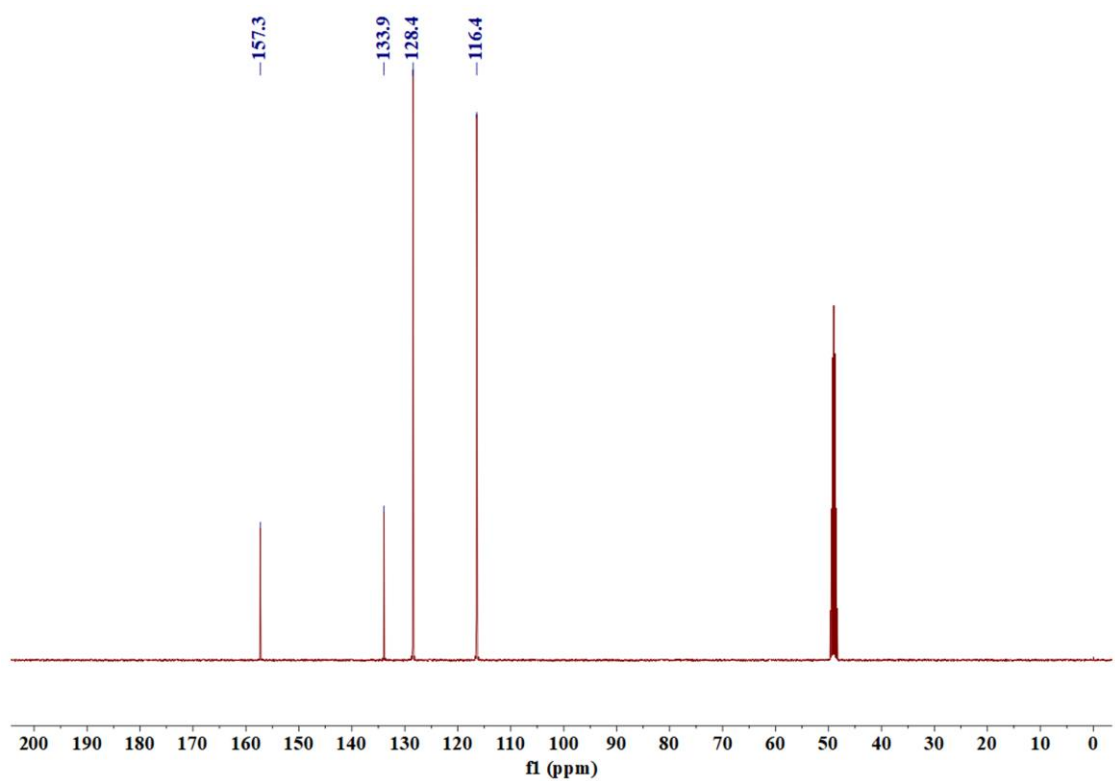

Fig. S38. <sup>13</sup>C NMR spectra (100 MHz, CD<sub>3</sub>OD) of 2j.

2k: [1,1'-biphenyl]-4-ol

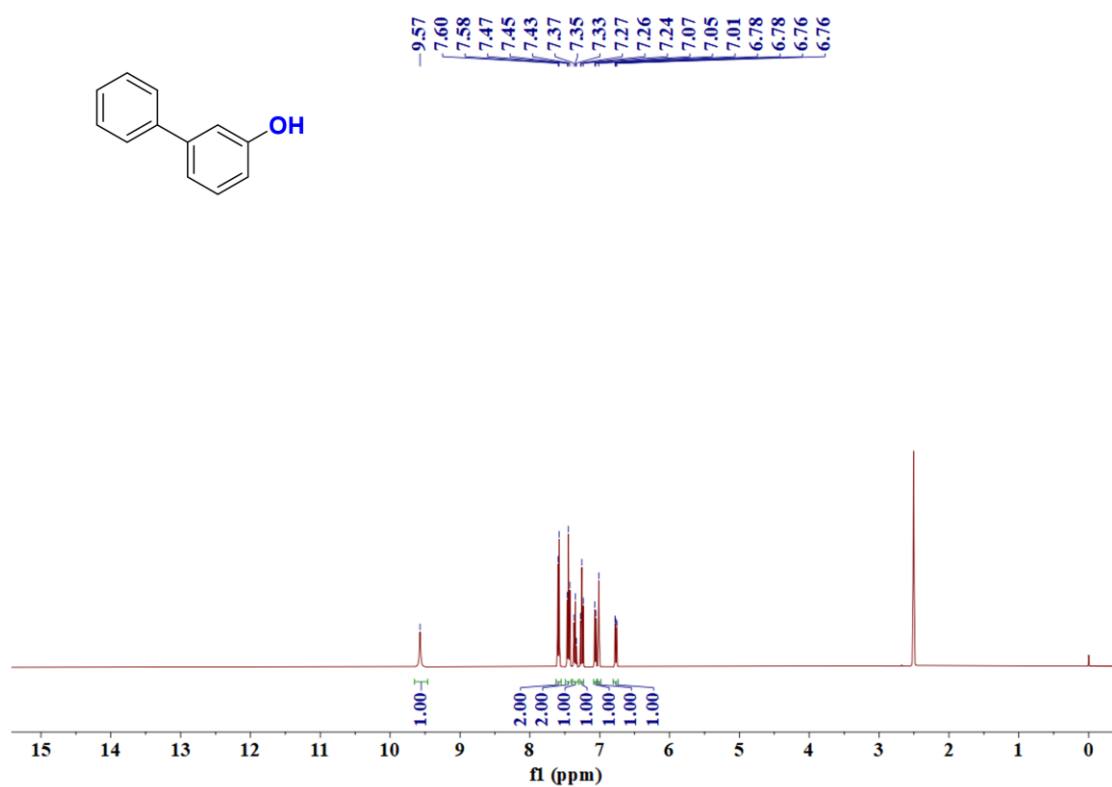

Fig. S39. <sup>1</sup>H NMR spectra (400 MHz, DMSO-*d*<sub>6</sub>) of 2k.

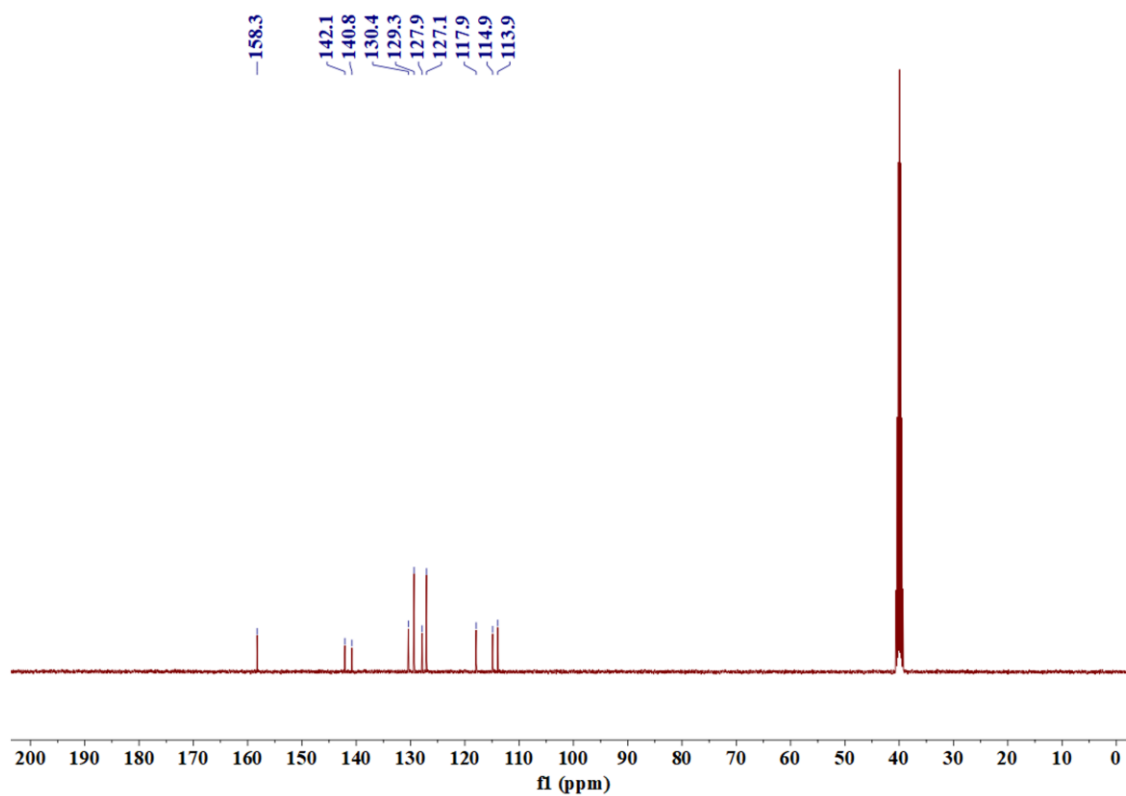

Fig. S40. <sup>13</sup>C NMR spectra (100 MHz, DMSO-*d*<sub>6</sub>) of 2k.

2l: [1,1'-biphenyl]-3-ol

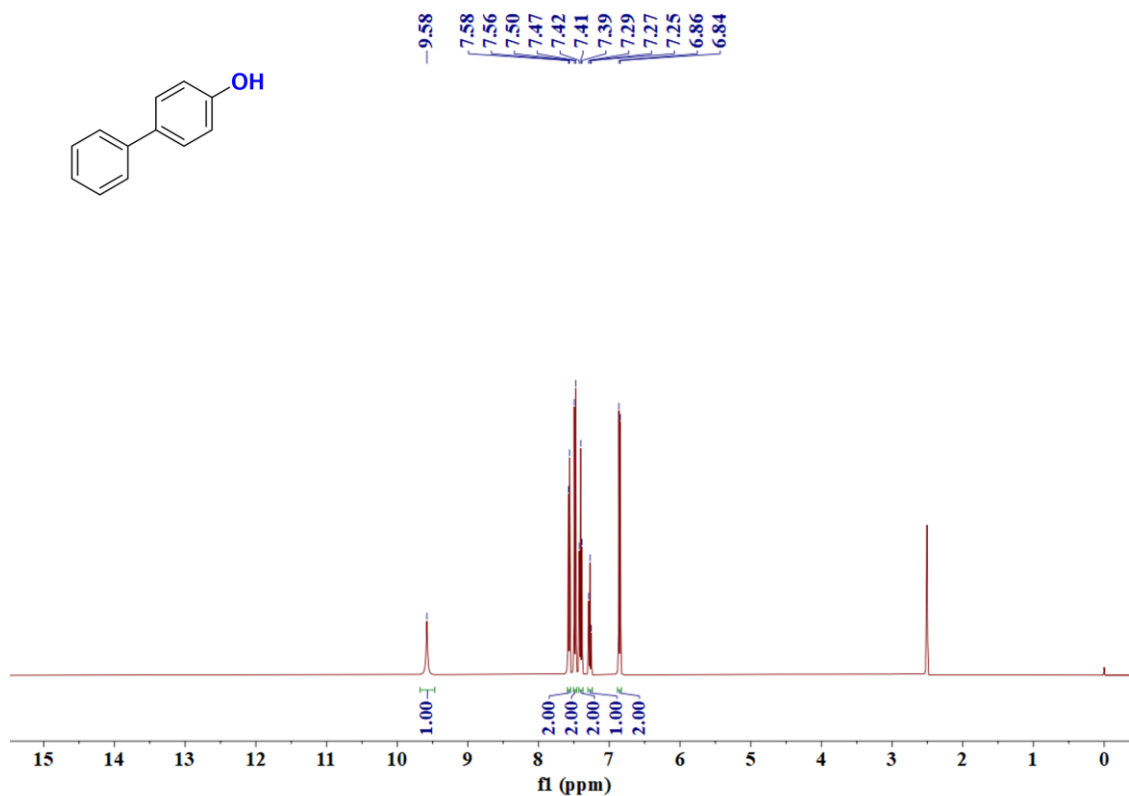

Fig. S41. <sup>1</sup>H NMR spectra (400 MHz, DMSO-*d*<sub>6</sub>) of 2l.

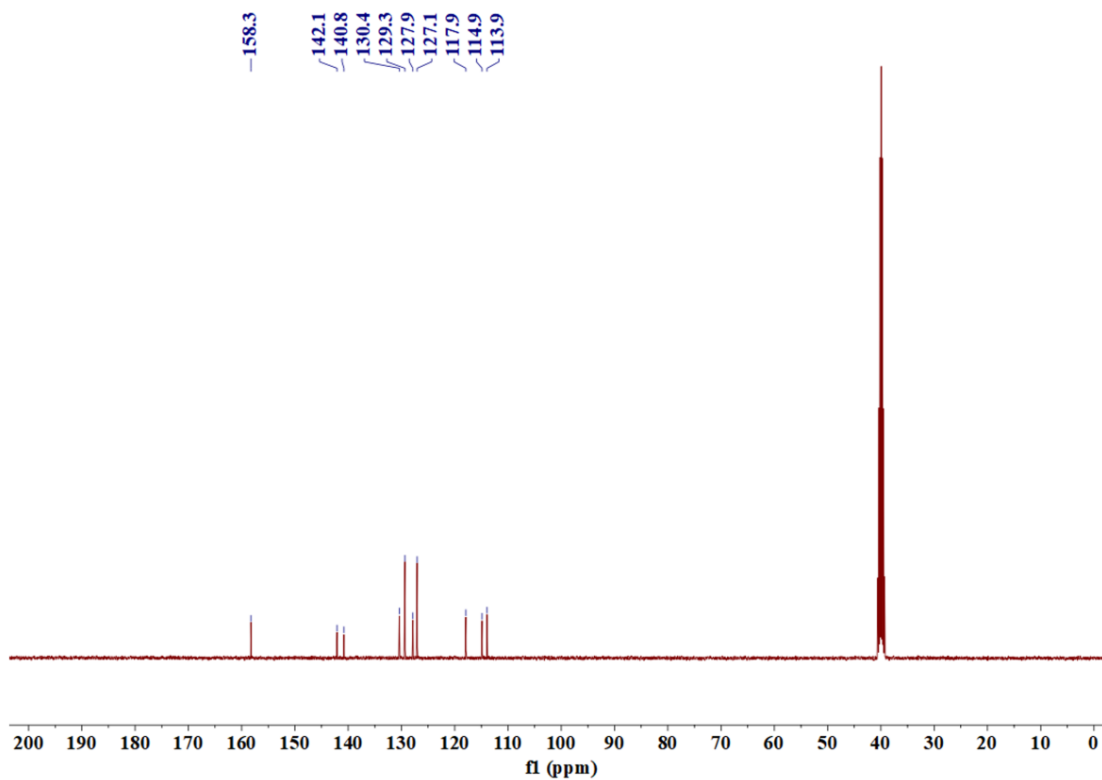

Fig. S42. <sup>13</sup>C NMR spectra (100 MHz, DMSO-*d*<sub>6</sub>) of 2l.

2m: 4-methoxyphenol

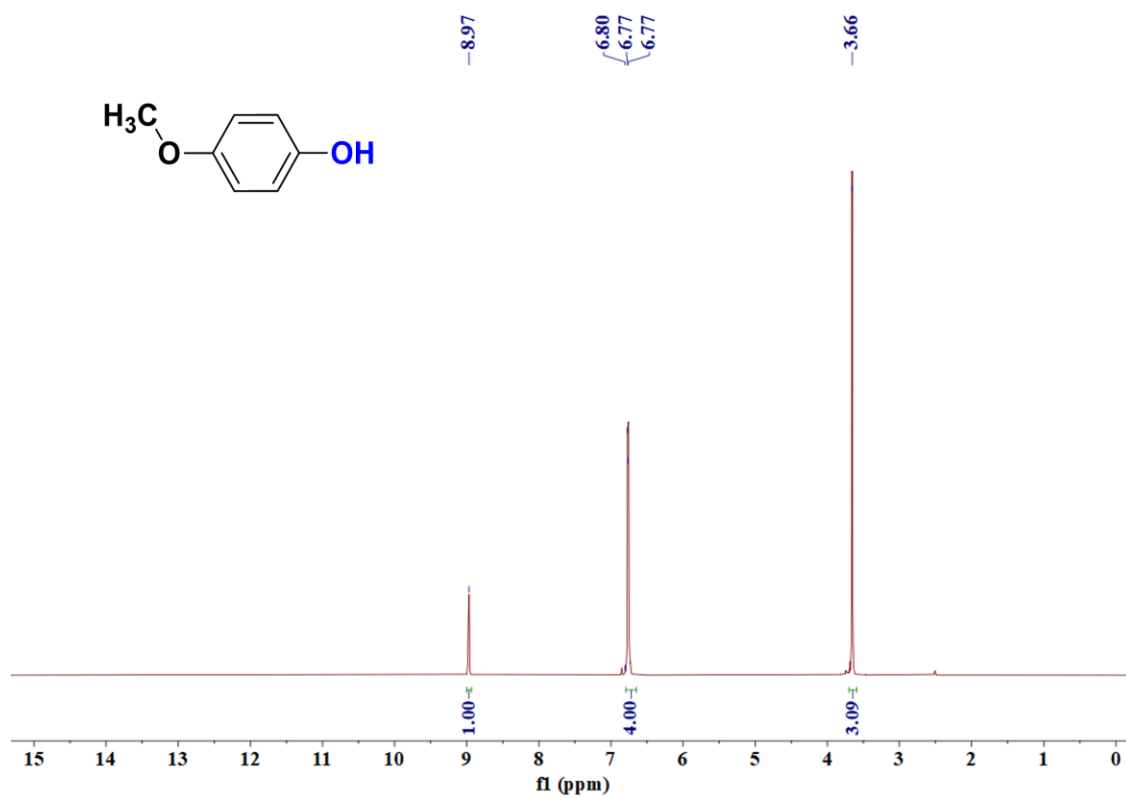

Fig. S43.  $^1\text{H}$  NMR spectra (400 MHz,  $\text{DMSO-}d_6$ ) of 2m.

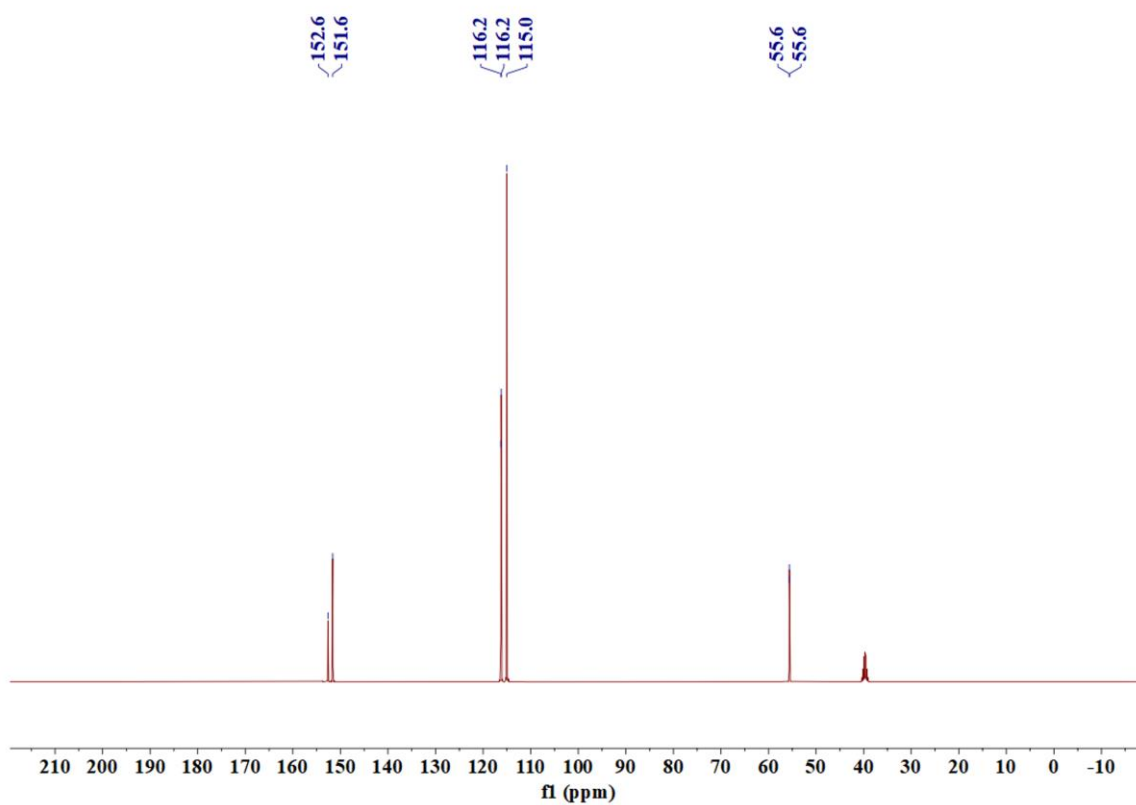

Fig. S44.  $^{13}\text{C}$  NMR spectra (100 MHz,  $\text{DMSO-}d_6$ ) of 2m.

2n: 2-hydroxybenzaldehyde

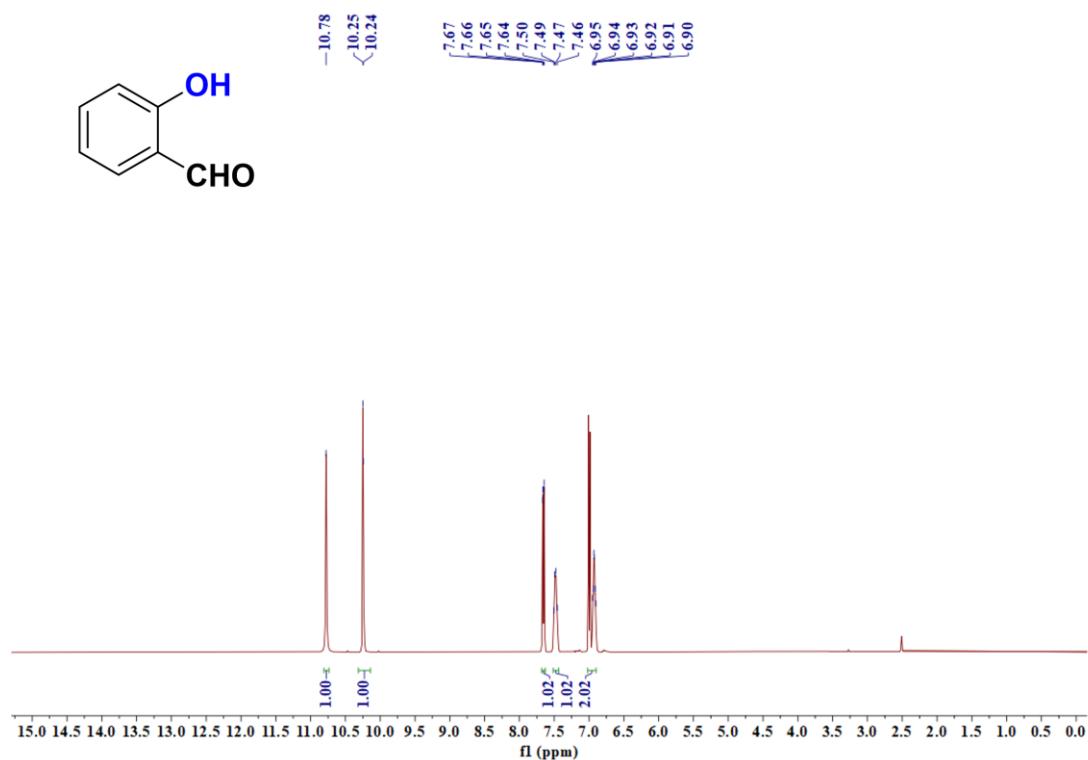

Fig. S45. <sup>1</sup>H NMR spectra (400 MHz, DMSO-*d*<sub>6</sub>) of 2n.

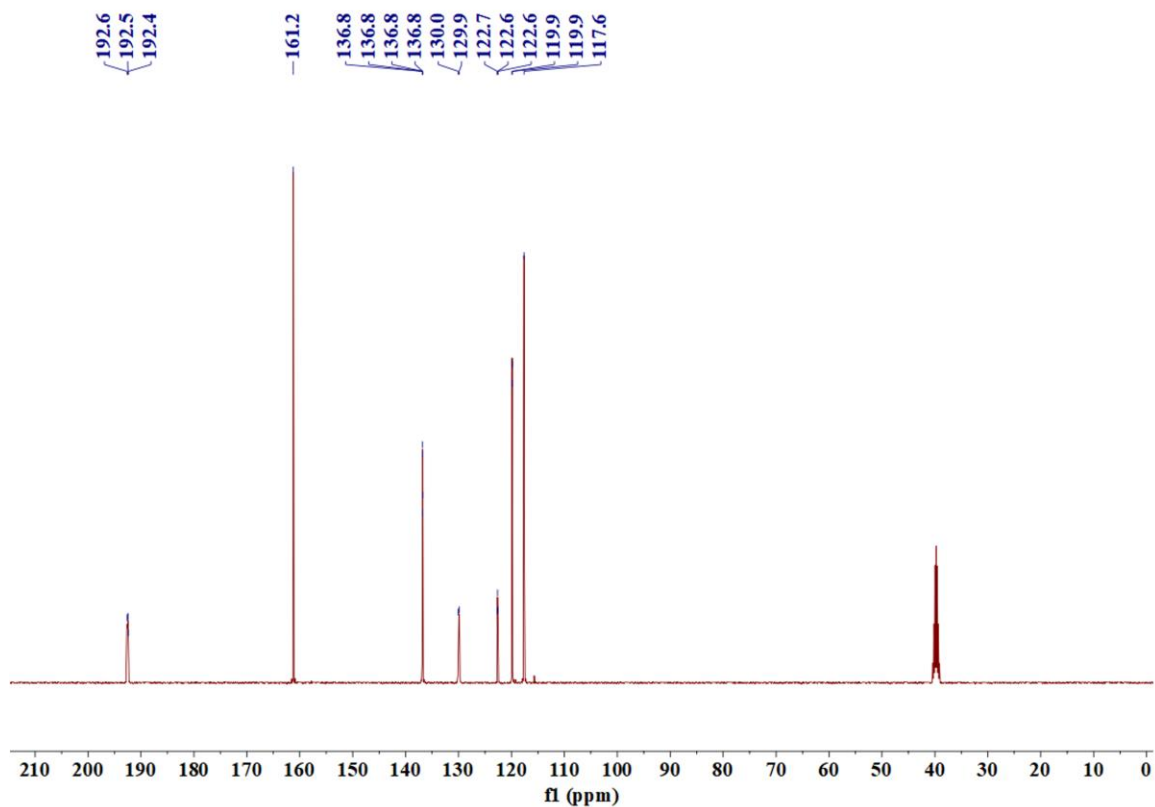

Fig. S46. <sup>13</sup>C NMR spectra (100 MHz, DMSO-*d*<sub>6</sub>) of 2n.

2o: 3-hydroxybenzaldehyde

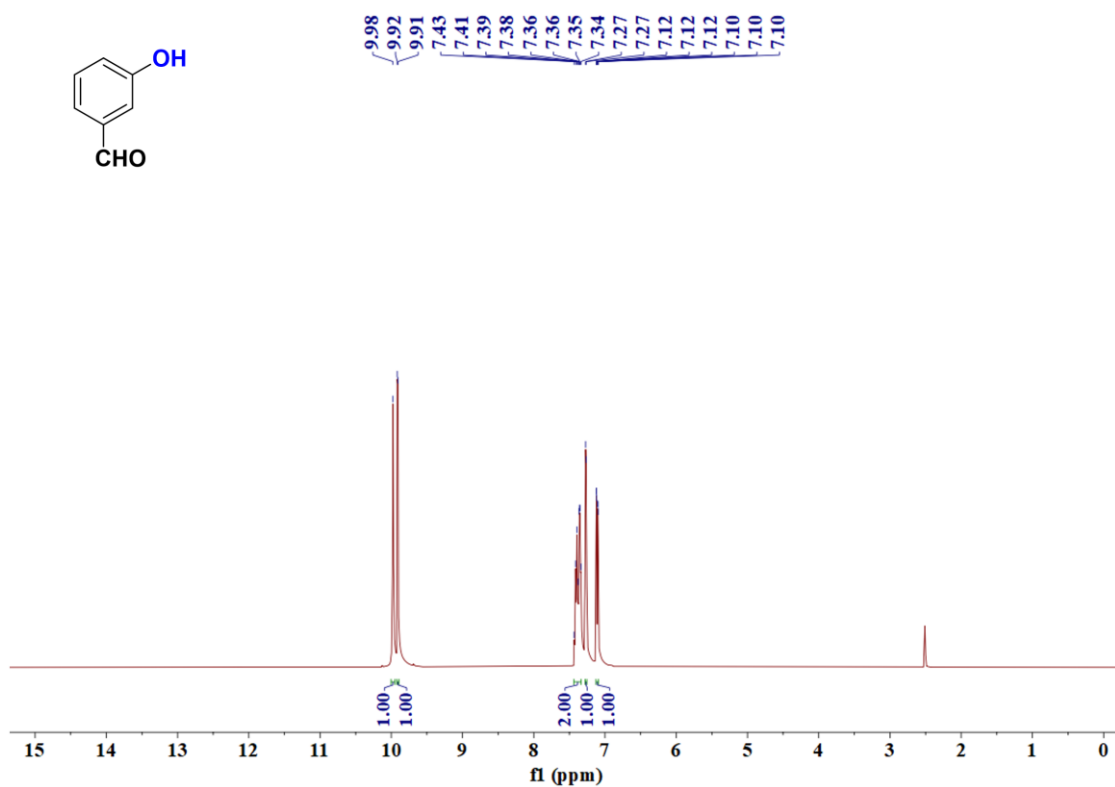

Fig. S47. <sup>1</sup>H NMR spectra (400 MHz, DMSO-*d*<sub>6</sub>) of 2o.

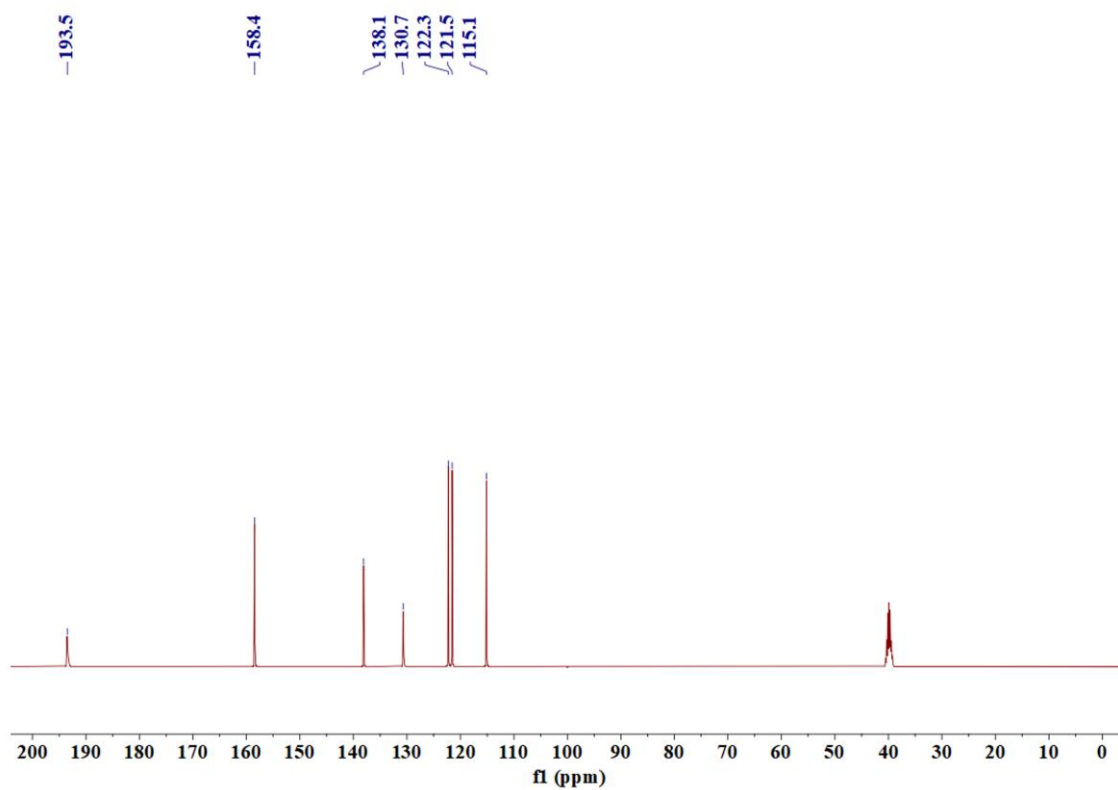

Fig. S48. <sup>13</sup>C NMR spectra (100 MHz, DMSO-*d*<sub>6</sub>) of 2o.

2p: 4-hydroxybenzaldehyde

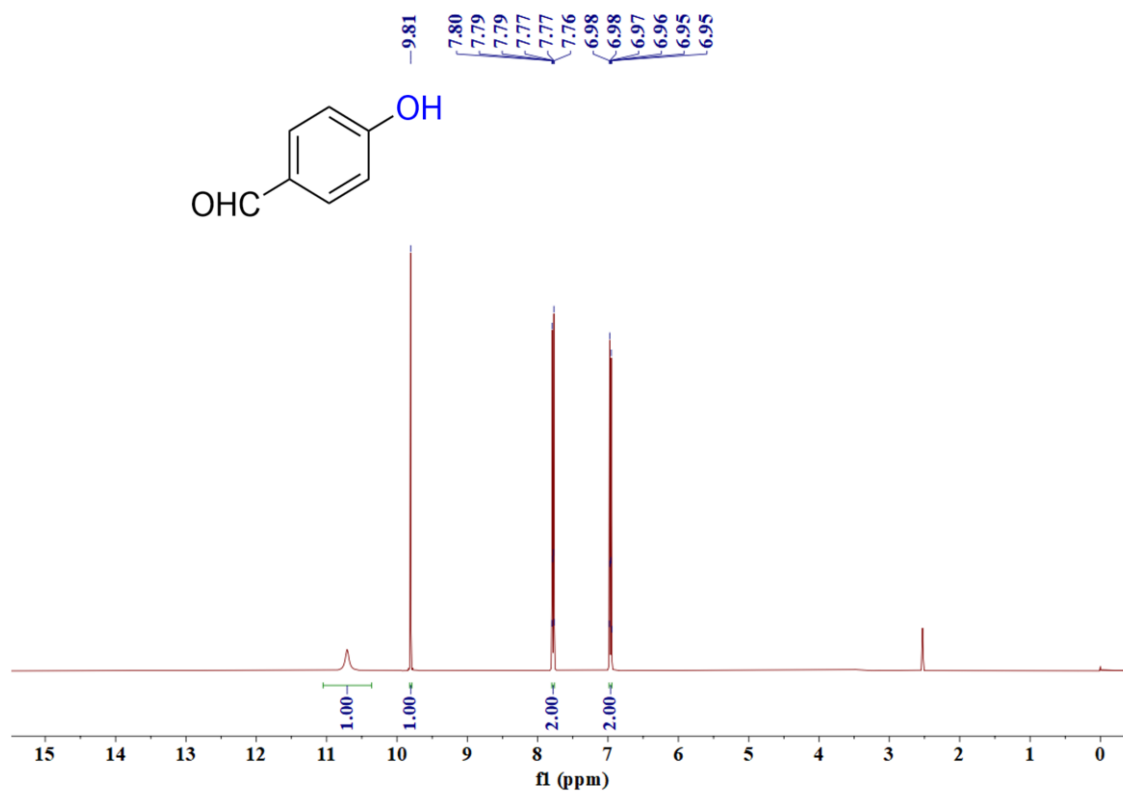

Fig. S49. <sup>1</sup>H NMR spectra (400 MHz, DMSO-*d*<sub>6</sub>) of 2p.

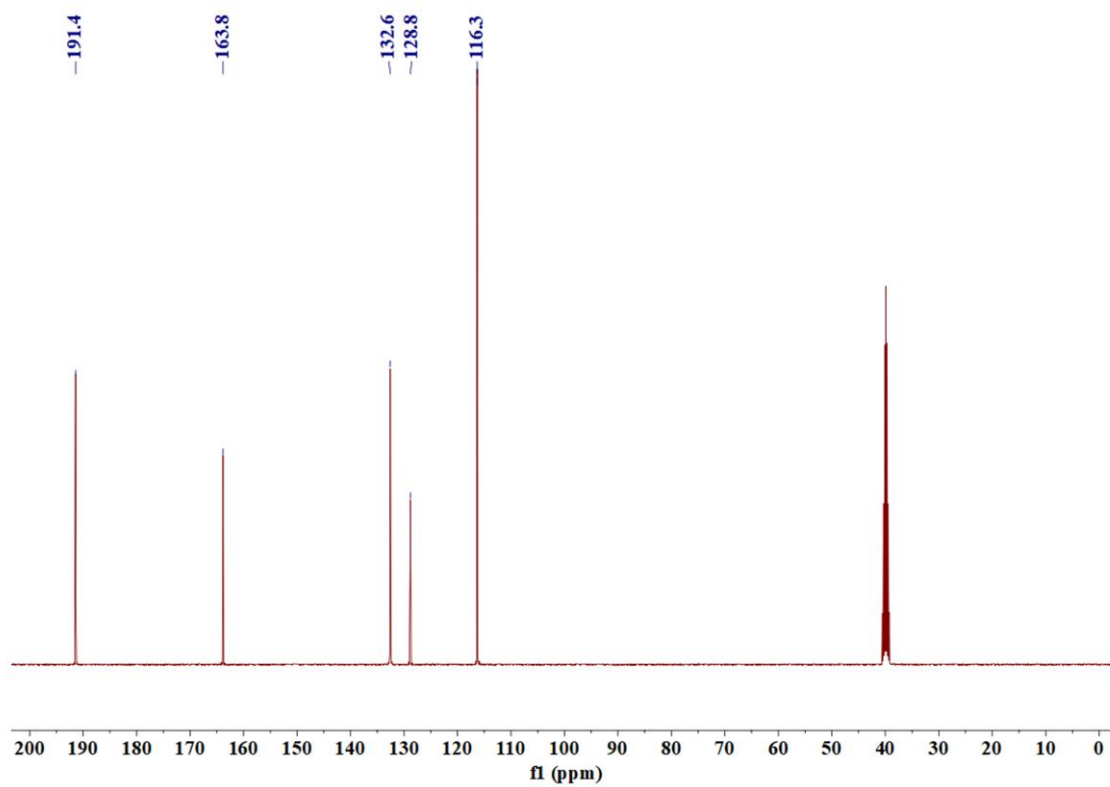

Fig. S50. <sup>13</sup>C NMR spectra (100 MHz, DMSO-*d*<sub>6</sub>) of 2p.

5a: 3-thiocyanato-1H-indole

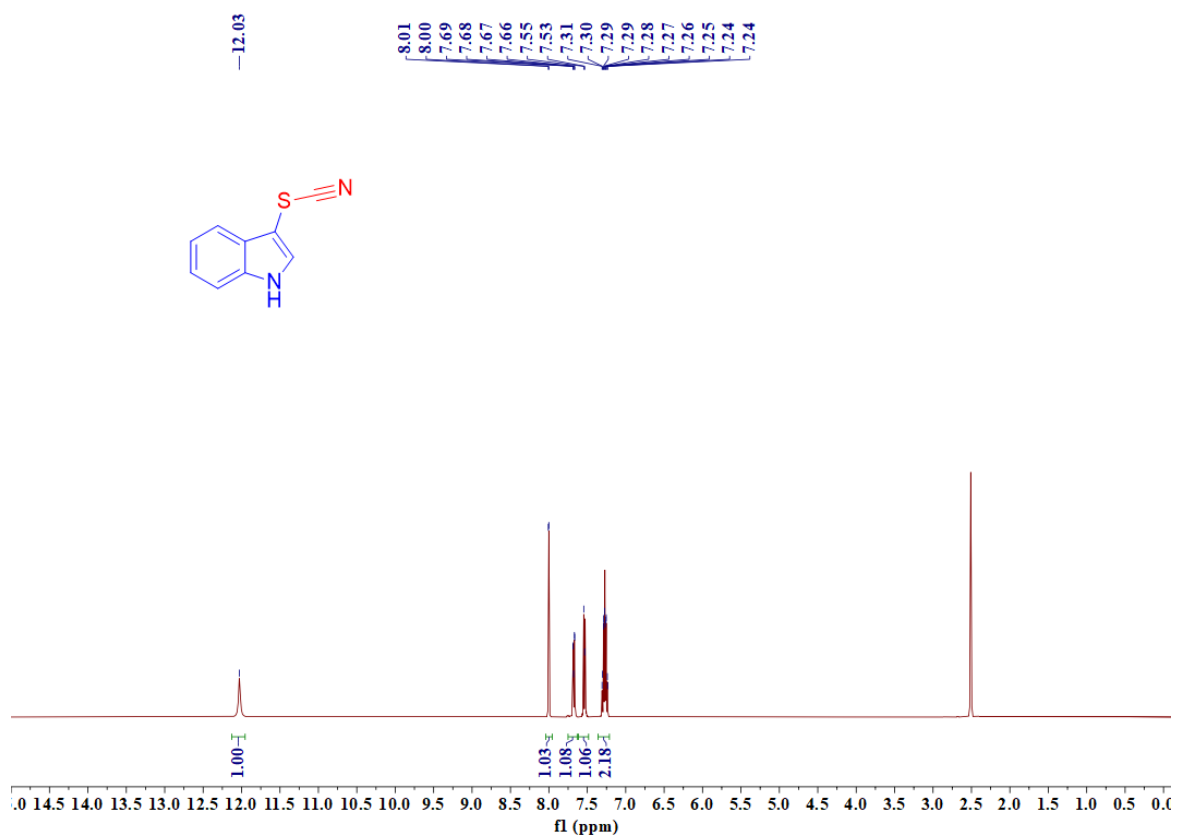

Fig. S51 <sup>1</sup>H NMR spectra (400 MHz, DMSO-*d*<sub>6</sub>) of 5a.

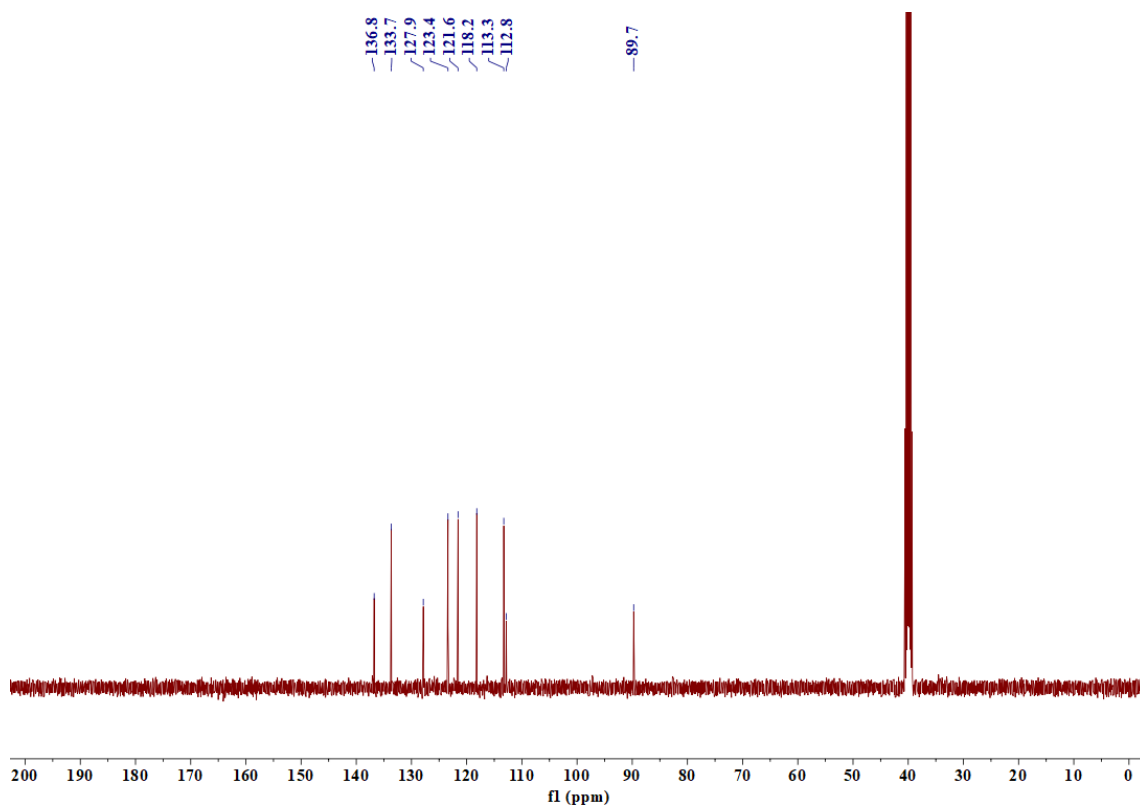

Fig. S52. <sup>13</sup>C NMR spectra (100 MHz, DMSO-*d*<sub>6</sub>) of 5a.



**5b: 2-methyl-3-thiocyanato-1H-indole**

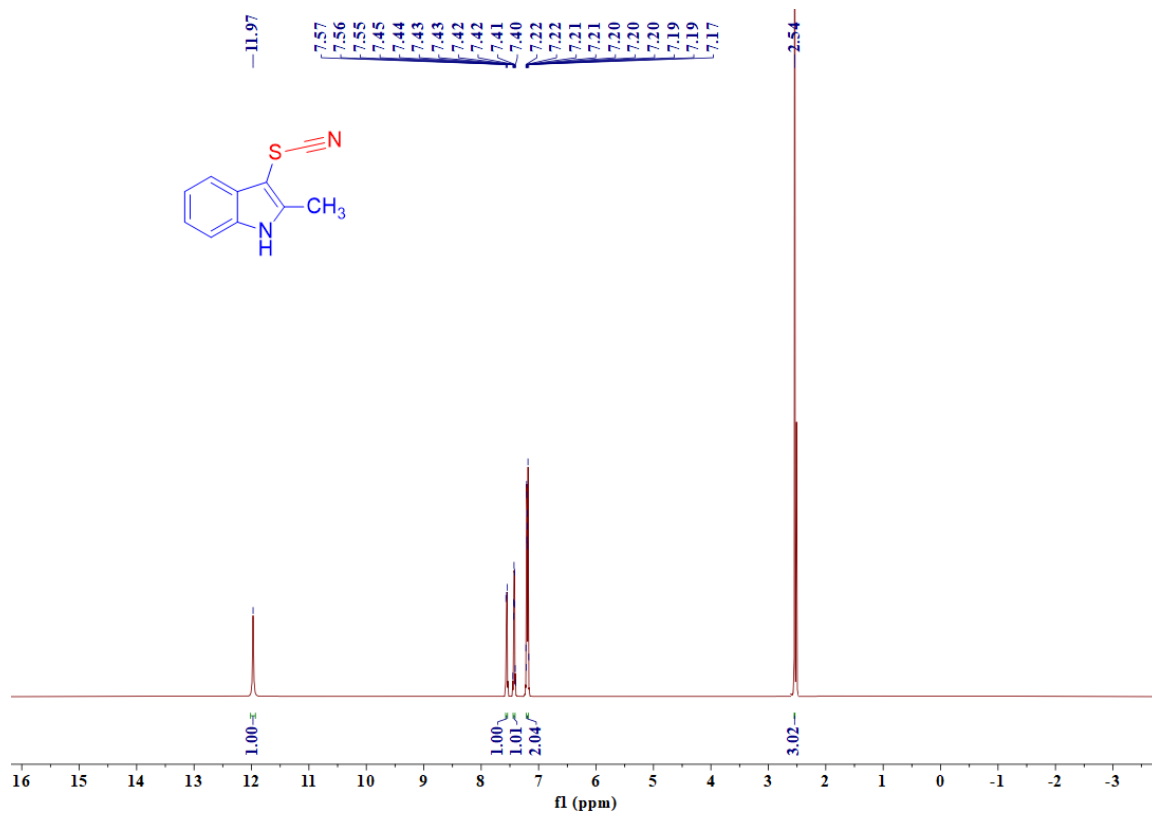

**Fig. S53. <sup>1</sup>H NMR spectra (400 MHz, DMSO-*d*<sub>6</sub>) of 5b.**

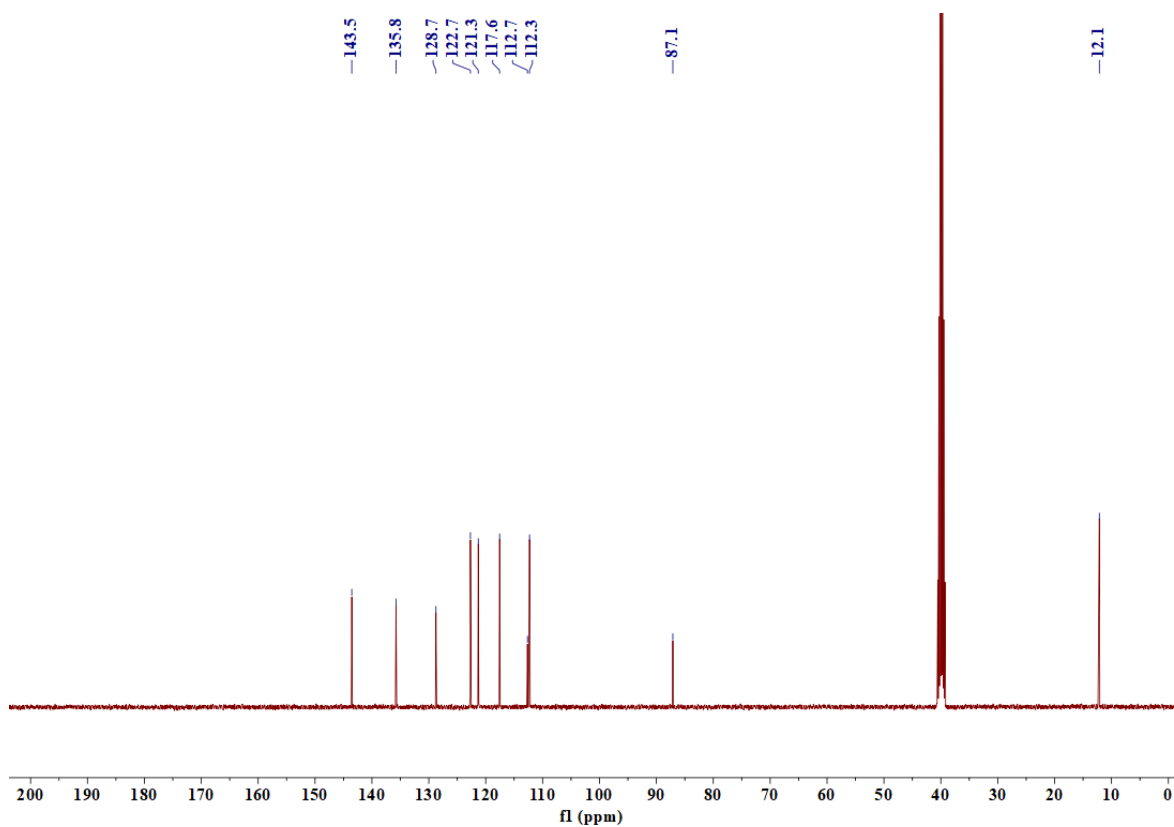

**Fig. S54. <sup>13</sup>C NMR spectra (100 MHz, DMSO-*d*<sub>6</sub>) of 5b.**

**5c: 2-phenyl-3-thiocyanato-1H-indole**

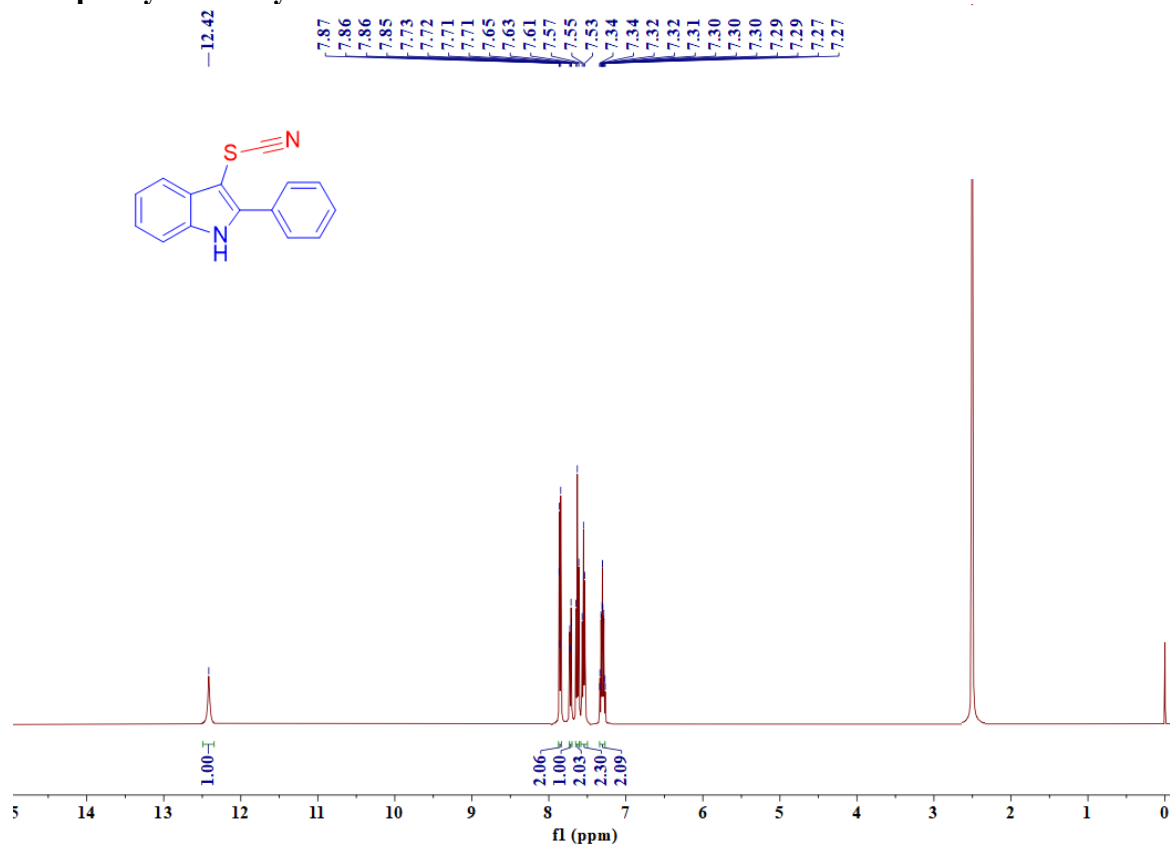

**Fig. S55.  $^1\text{H}$  NMR spectra (400 MHz,  $\text{DMSO-}d_6$ ) of 5c.**

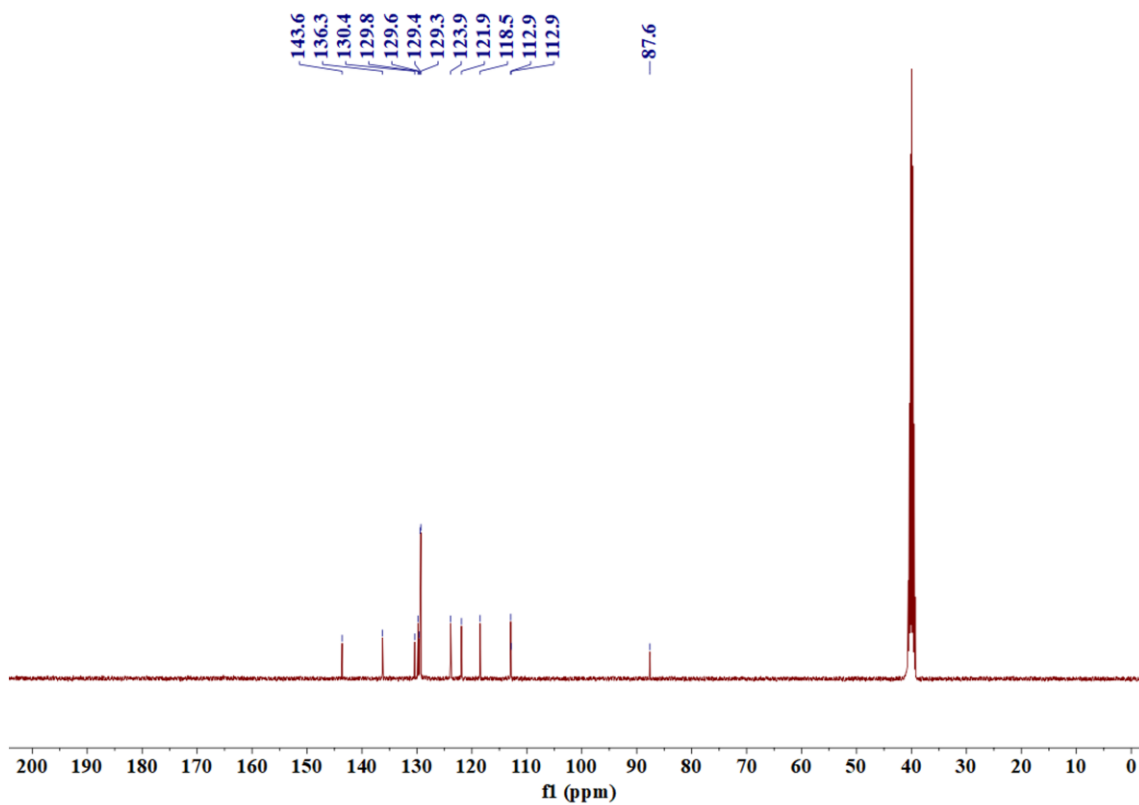

**Fig. S56.  $^{13}\text{C}$  NMR spectra (100 MHz,  $\text{DMSO-}d_6$ ) of 5c.**

**5d: 4-methyl-3-thiocyanato-1H-indole**

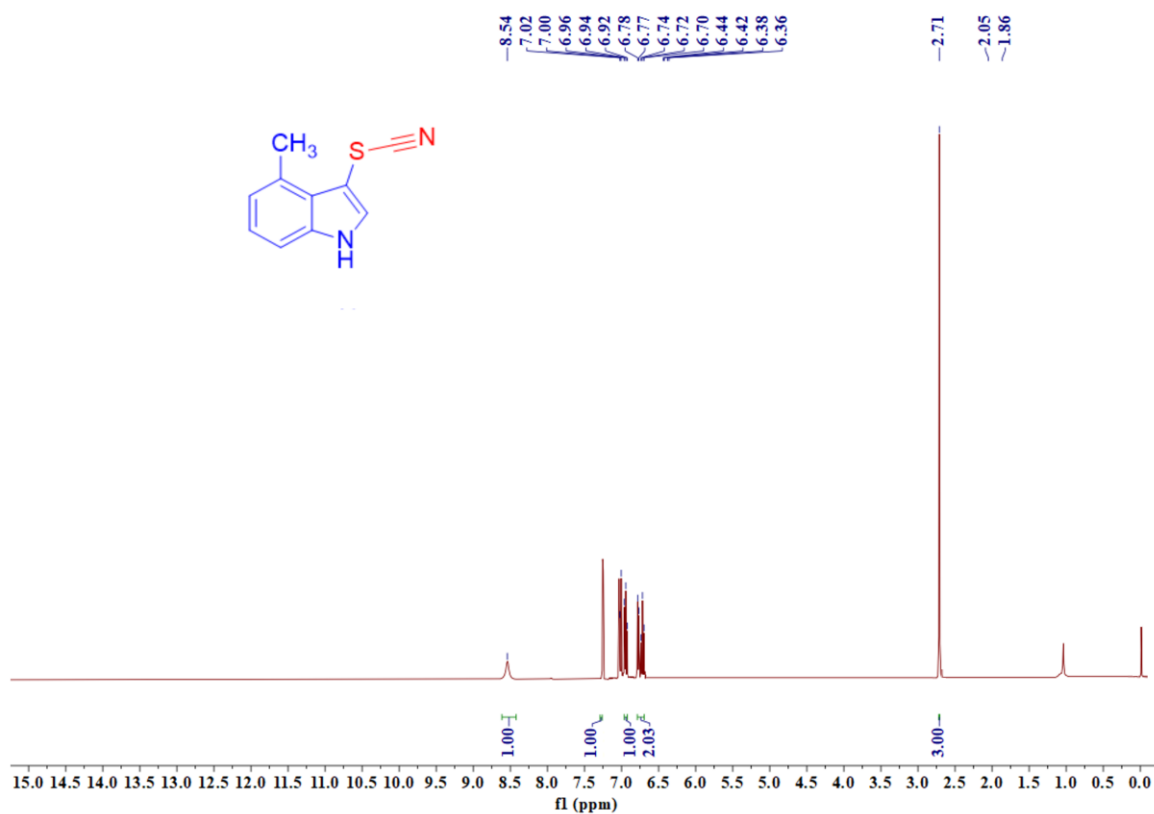

**Fig. S57. <sup>1</sup>H NMR spectra (400 MHz, DMSO-*d*<sub>6</sub>) of 5d.**

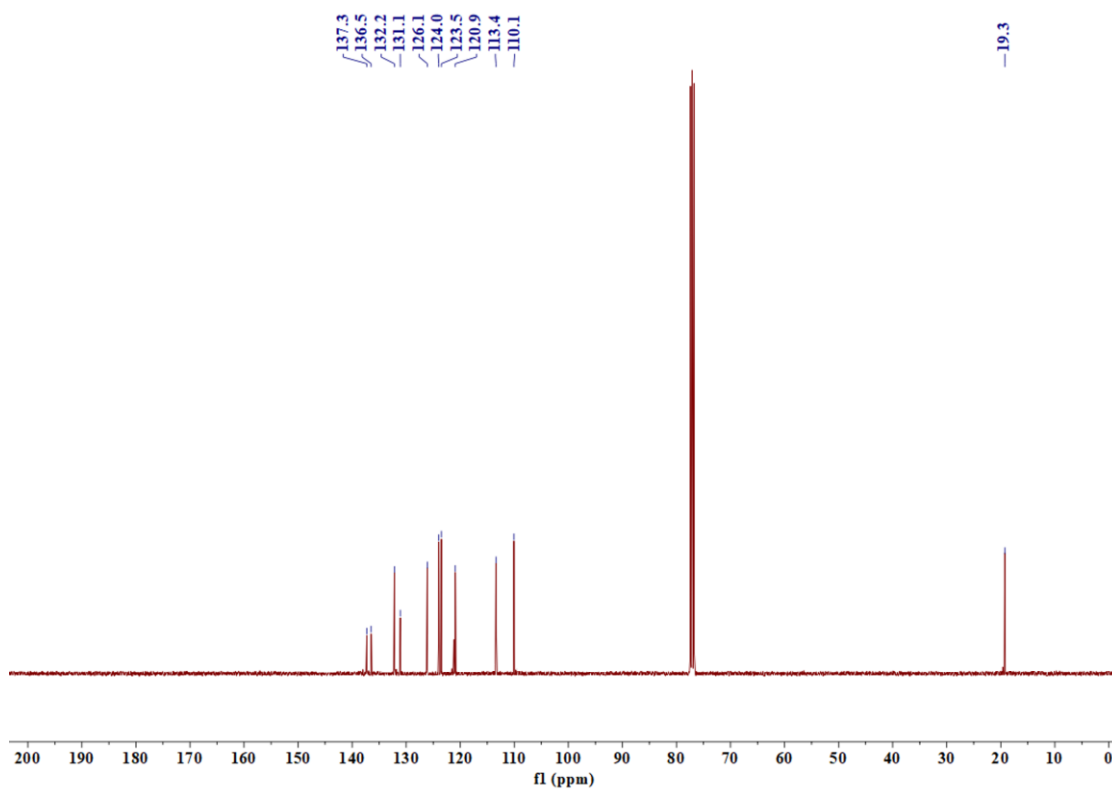

**Fig. S58. <sup>13</sup>C NMR spectra (100 MHz, DMSO-*d*<sub>6</sub>) of 5d.**

5e: 5-methyl-3-thiocyanato-1H-indole

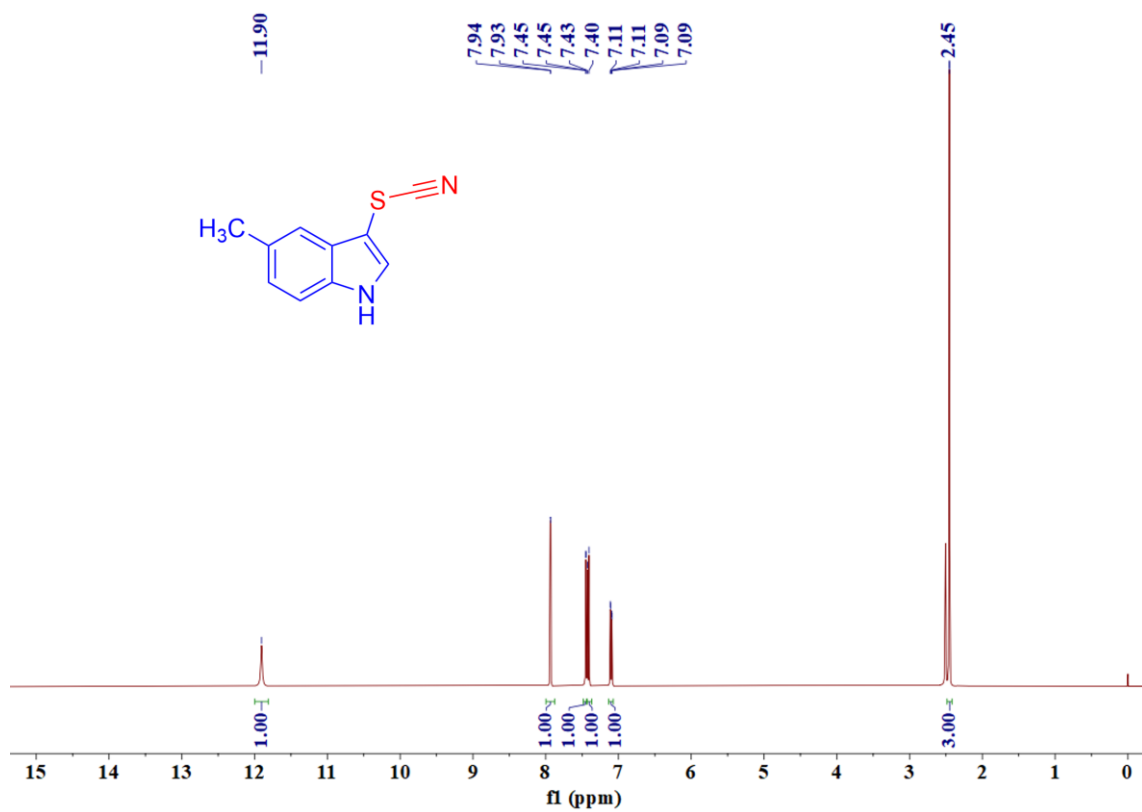

Fig. S59. <sup>1</sup>H NMR spectra (400 MHz, DMSO-*d*<sub>6</sub>) of 5e.

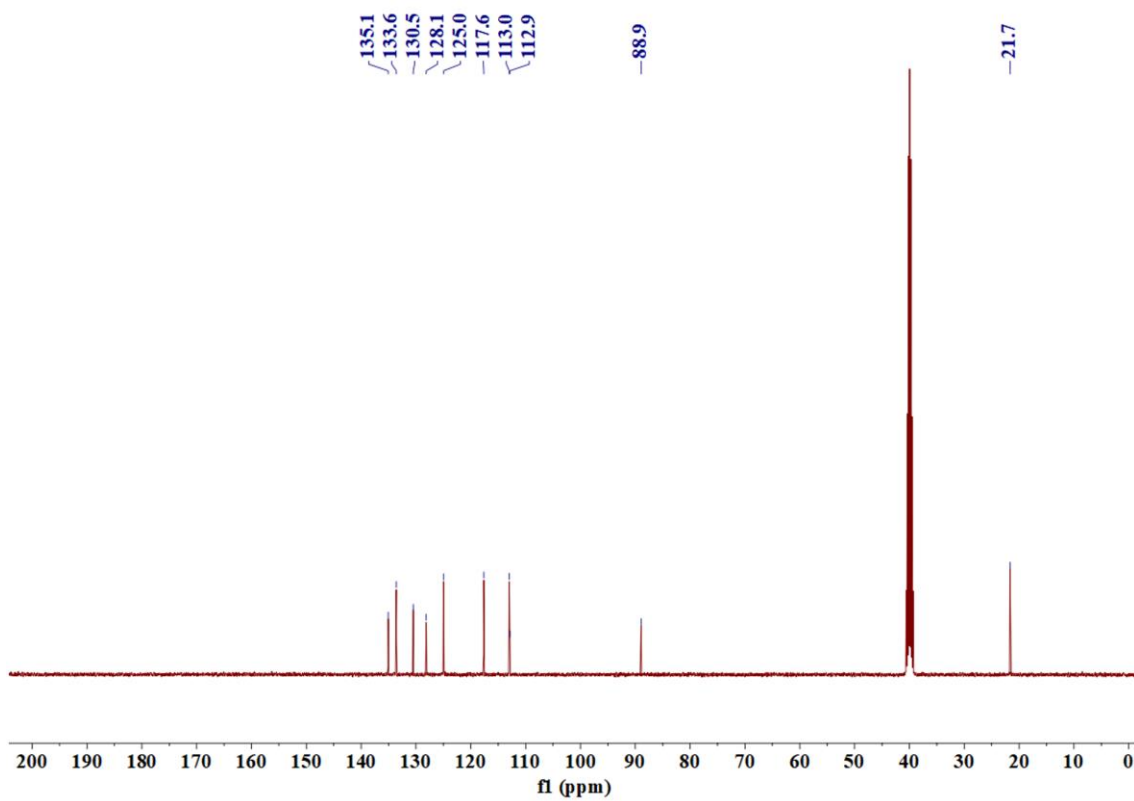

Fig. S60. <sup>13</sup>C NMR spectra (100 MHz, DMSO-*d*<sub>6</sub>) of 5e.

5f: 5-bromo-3-thiocyanato-1H-indole

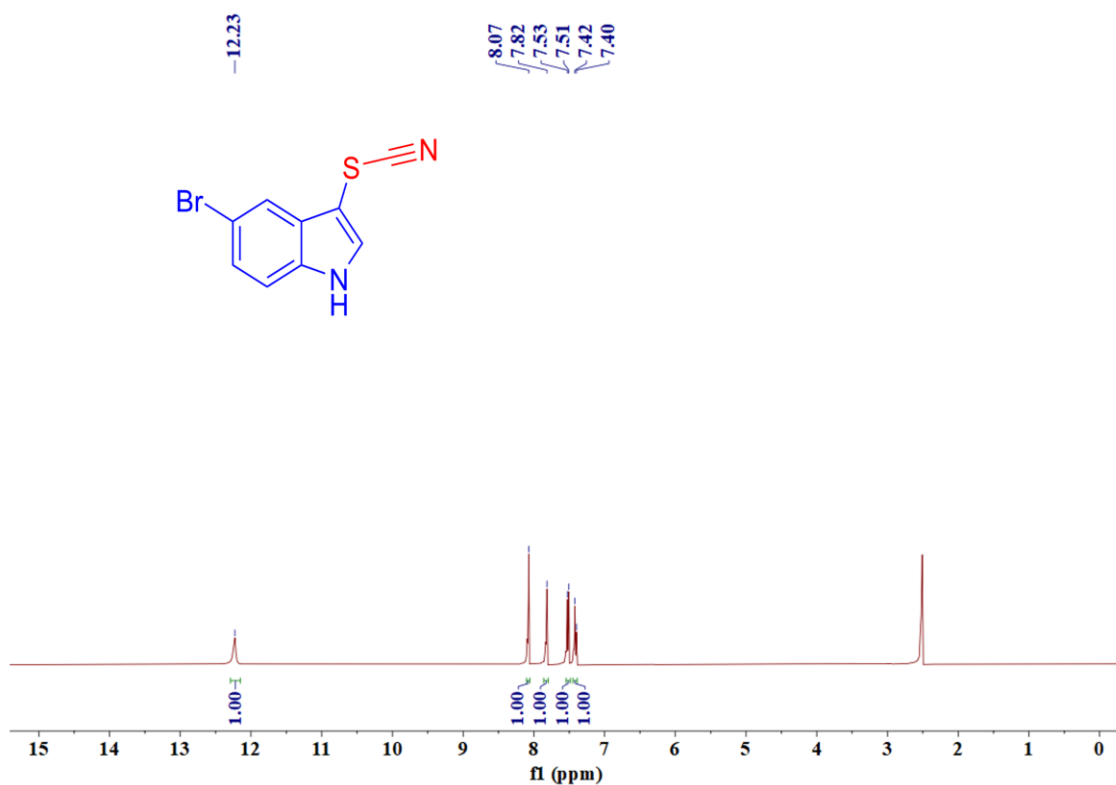

Fig. S61. <sup>1</sup>H NMR spectra (400 MHz, DMSO-*d*<sub>6</sub>) of 5f.

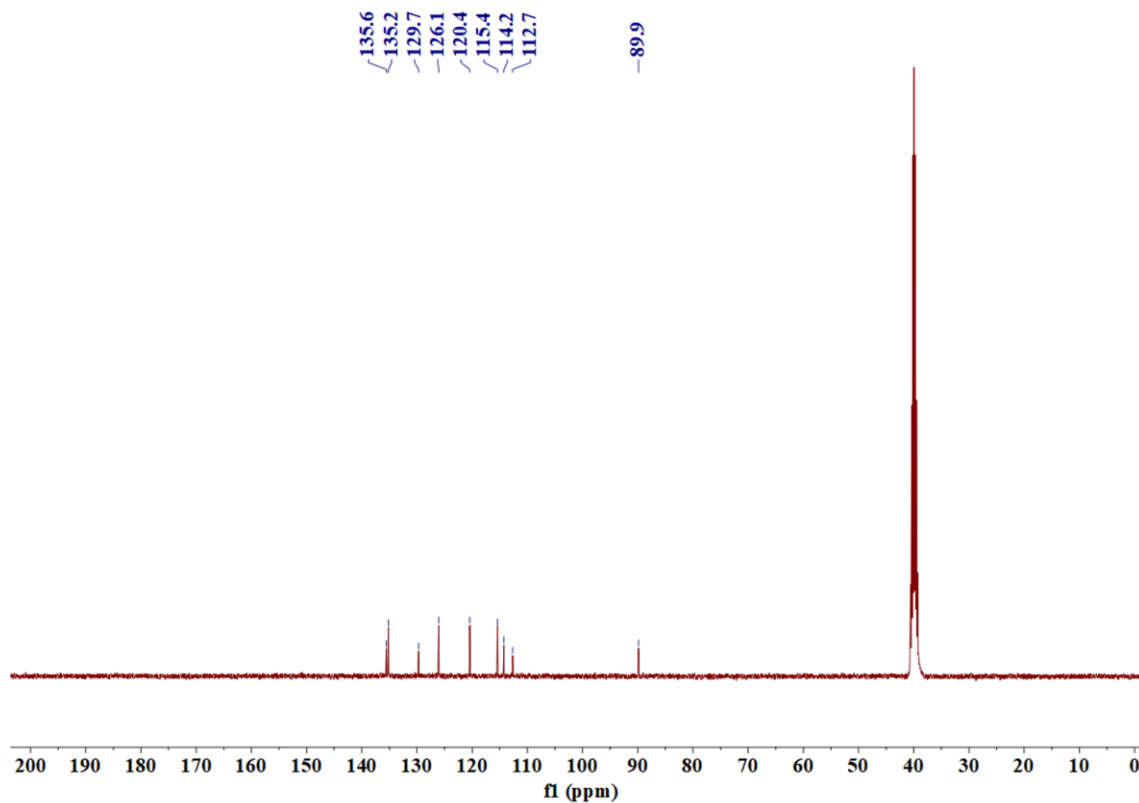

Fig. S62. <sup>13</sup>C NMR spectra (100 MHz, DMSO-*d*<sub>6</sub>) of 5f.

5g: 5-methoxy-3-thiocyanato-1H-indole

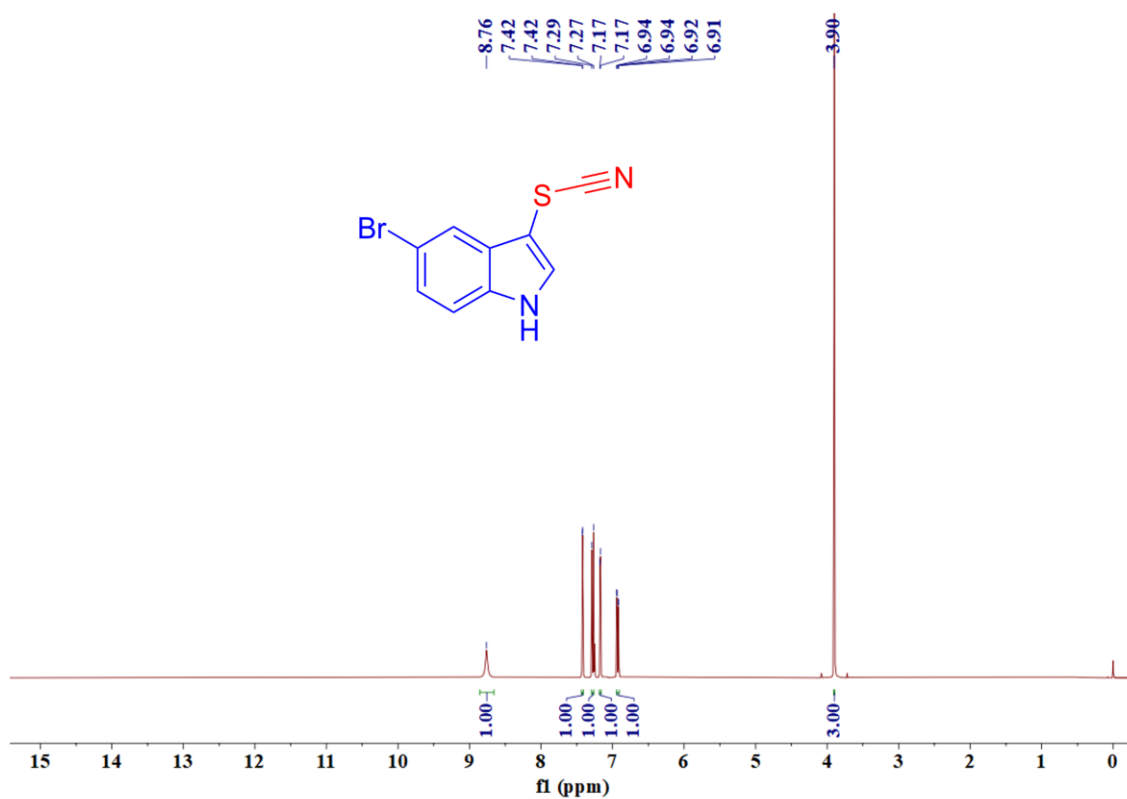

Fig. S63. <sup>1</sup>H NMR spectra (400 MHz, DMSO-*d*<sub>6</sub>) of 5g.

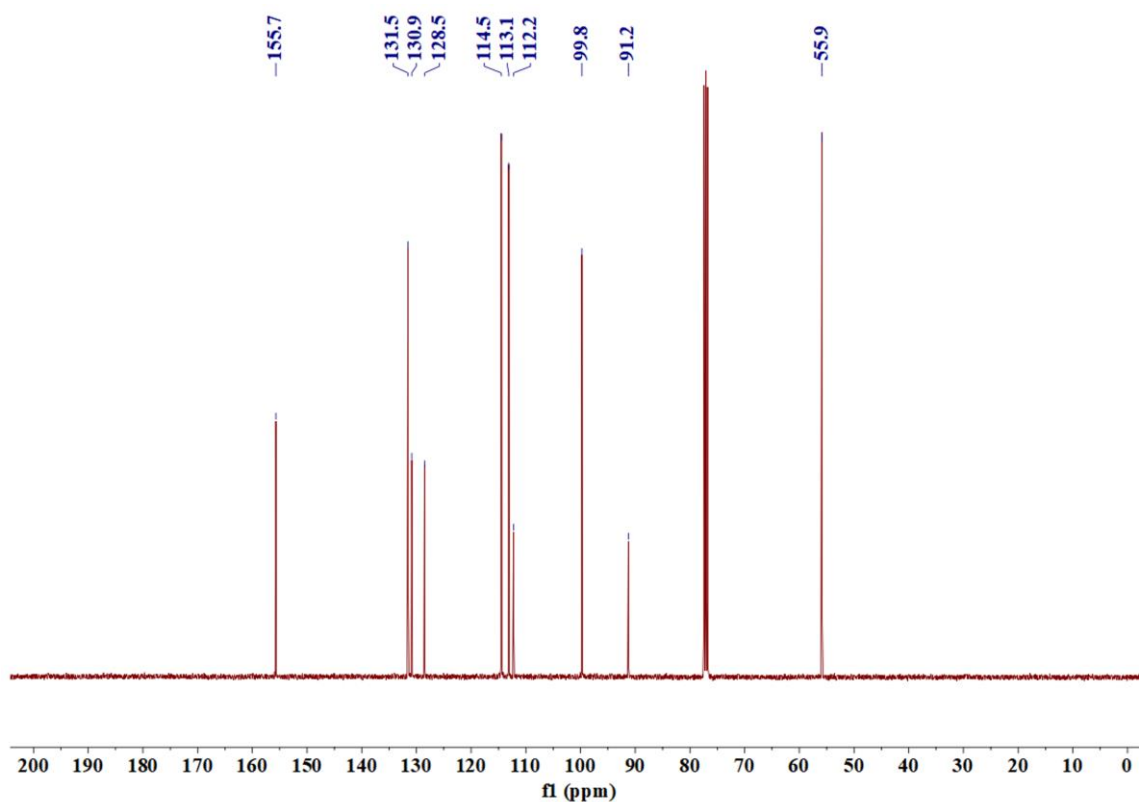

Fig. S64. <sup>13</sup>C NMR spectra (100 MHz, DMSO-*d*<sub>6</sub>) of 5g.

5h: 6-methyl-3-thiocyanato-1H-indole

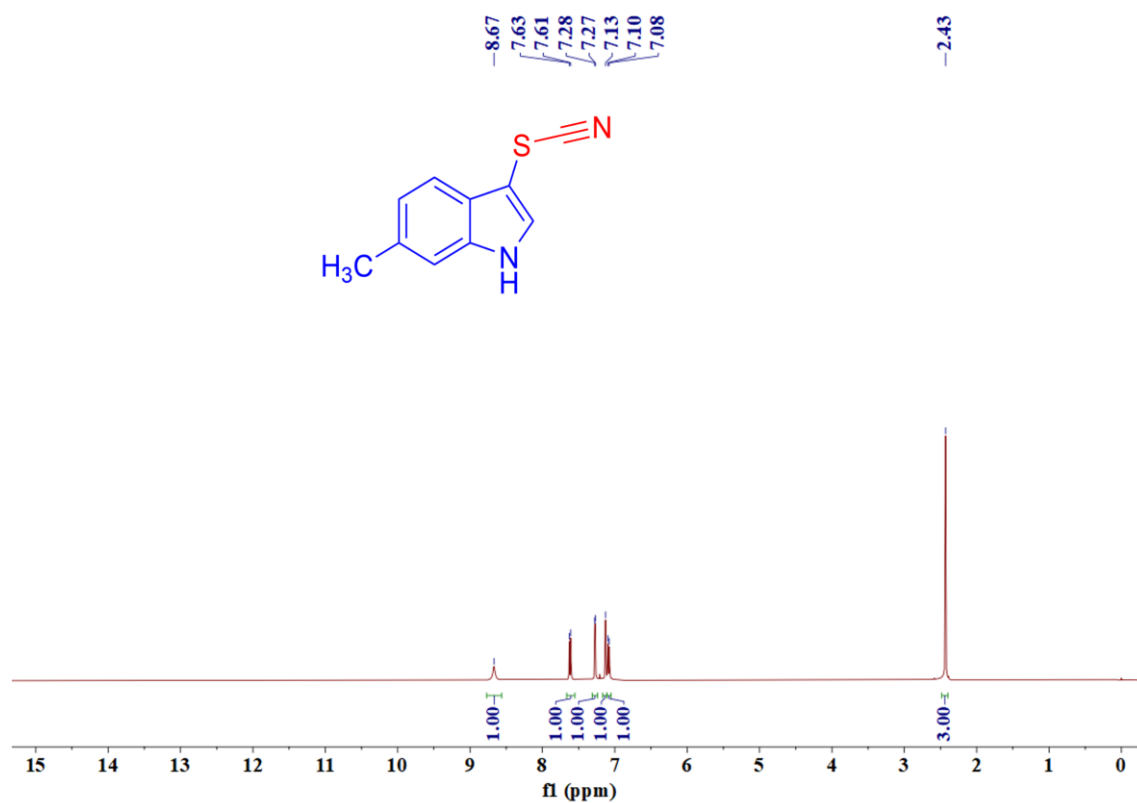

Fig. S65. <sup>1</sup>H NMR spectra (400 MHz, DMSO-*d*<sub>6</sub>) of 5h.

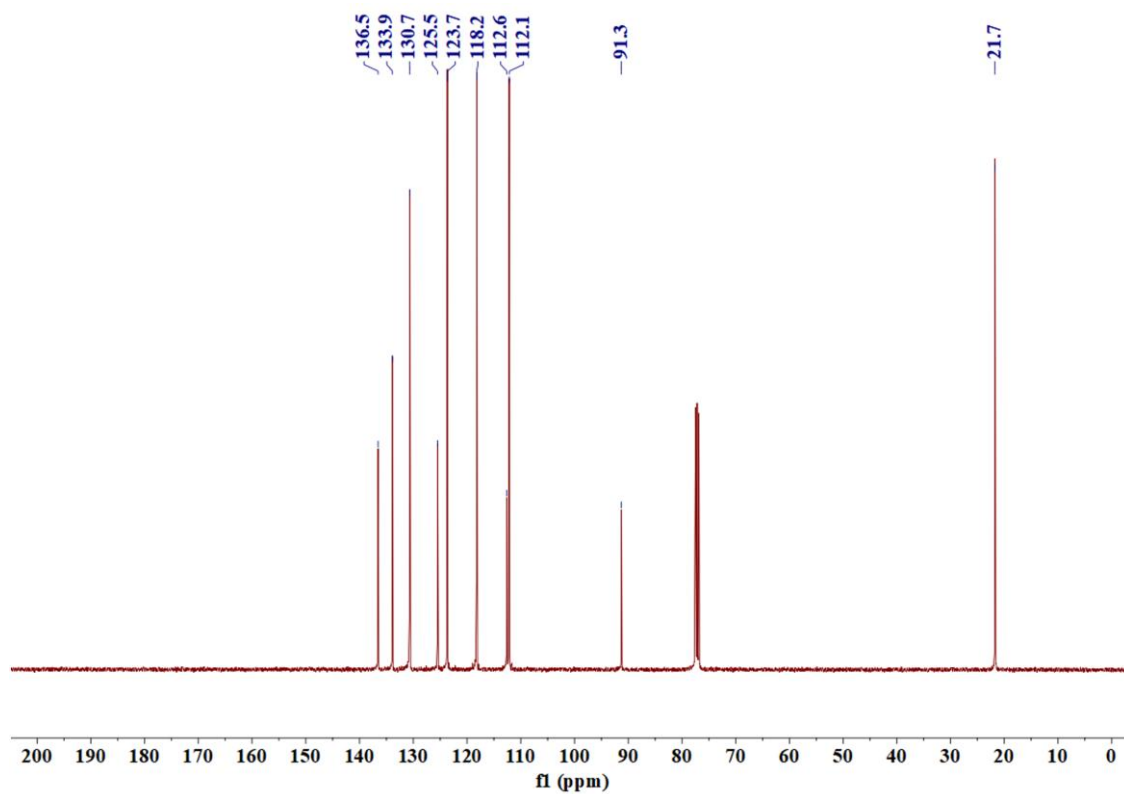

Fig. S66. <sup>13</sup>C NMR spectra (100 MHz, DMSO-*d*<sub>6</sub>) of 5h.

5i: 7-methyl-3-thiocyanato-1H-indole

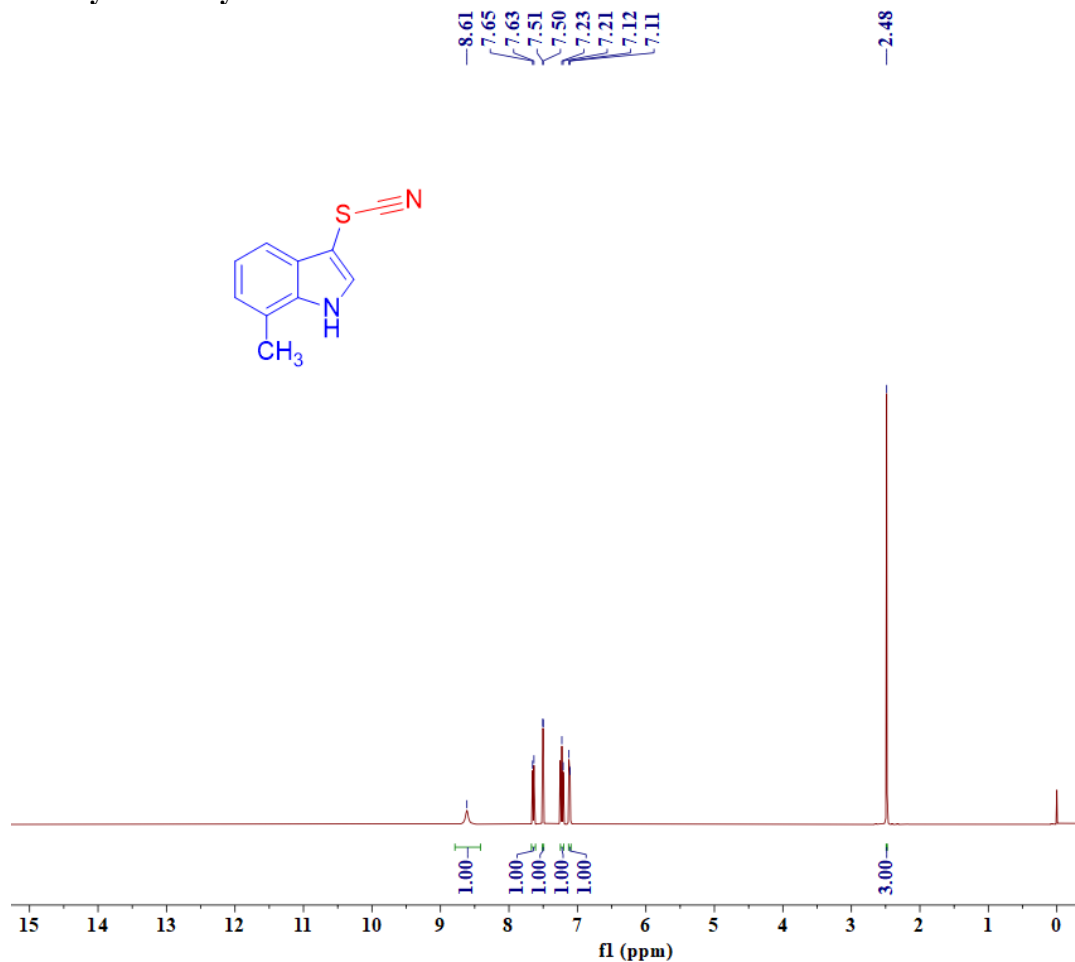

Fig. S67. <sup>1</sup>H NMR spectra (400 MHz, DMSO-*d*<sub>6</sub>) of 5i.

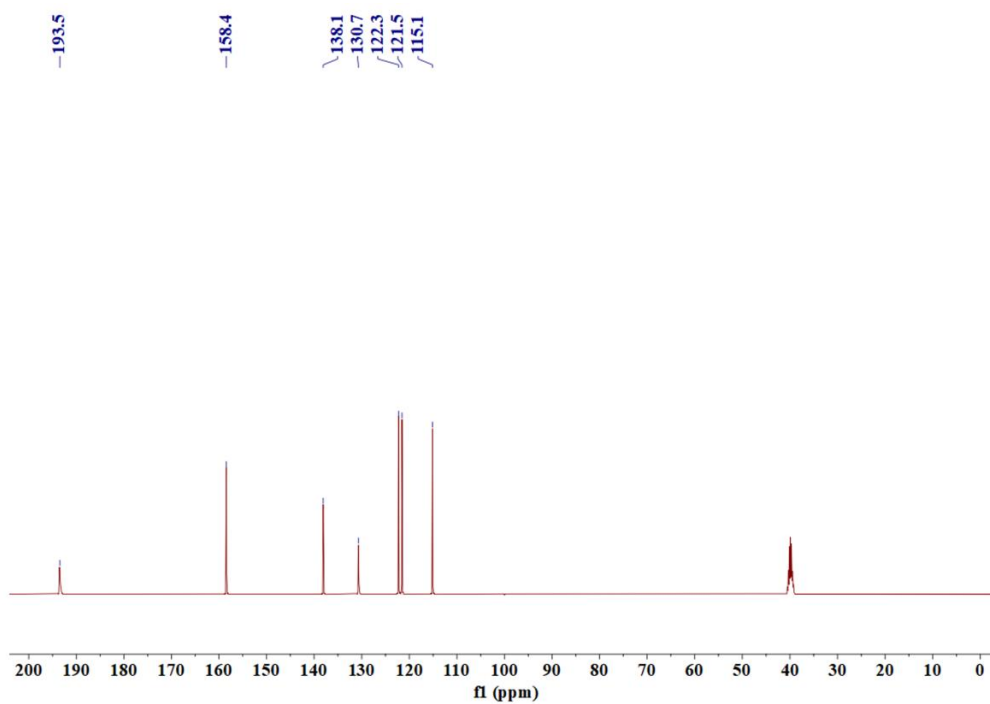

Fig. S68. <sup>13</sup>C NMR spectra (100 MHz, DMSO-*d*<sub>6</sub>) of 5i.
